# Supplementary material for: Whole Genome Sequencing and Comparative Analysis of the First Ehrlichia canis Isolate in China
Source: MDPI journal article supplement (doi:10.3390/microorganisms12010125), 2024-01-08
Supplement: s1 [file s1]

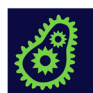

Supplementary Table S1. Pathogen-host interactions analysis of *E. canis* YZ-1

| Gene-ID  | Identity | Gene-Name                | Protein-Accession | Species                            | Phenotype                                |
|----------|----------|--------------------------|-------------------|------------------------------------|------------------------------------------|
| GM000005 | 60.0     | <i>dnaJ</i>              | CAG46145          | <i>Francisella tularensis</i>      | unaffected pathogenicity                 |
| GM000101 | 50.0     | <i>smpB</i>              | SSRP_SALTY        | <i>Salmonella enterica</i>         | reduced virulence                        |
| GM000119 | 44.3     | <i>XAC1722</i>           | AAM36589          | <i>Xanthomonas citri</i>           | reduced virulence                        |
| GM000135 | 40.0     | <i>MacB</i>              | AAL19878          | <i>Salmonella enterica</i>         | reduced virulence                        |
| GM000144 | 49.2     | <i>nrdR</i>              | AAK33390          | <i>Streptococcus pyogenes</i>      | reduced virulence                        |
| GM000176 | 40.3     | <i>thioredoxin 1</i>     | BAA00903          | <i>Salmonella enterica</i>         | reduced virulence                        |
| GM000185 | 50.0     | <i>IMPDH</i>             | ADE32434          | <i>Streptococcus suis</i>          | reduced virulence                        |
| GM000272 | 43.1     | <i>GzOB048</i>           | FGSG_13818        | <i>Fusarium graminearum</i>        | unaffected pathogenicity                 |
| GM000287 | 51.9     | <i>glyA</i>              | ACR70340          | <i>Edwardsiella ictaluri</i>       | reduced virulence                        |
| GM000289 | 48.0     | <i>MacB</i>              | AAL19878          | <i>Salmonella enterica</i>         | reduced virulence                        |
| GM000291 | 59.2     | <i>frdA</i>              | ACR67633          | <i>Edwardsiella ictaluri</i>       | reduced virulence                        |
| GM000333 | 52.2     | <i>GroEL</i>             | BAA04222          | <i>Porphyromonas gingivalis</i>    | increased (hypervirulence) virulence     |
| GM000385 | 40.4     | <i>secY</i>              | CAD00690          | <i>Listeria monocytogenes</i>      | increased (hypervirulence) virulence     |
| GM000400 | 52.4     | <i>pstB</i>              | AAM36442          | <i>Xanthomonas citri</i>           | loss of pathogenicity                    |
| GM000415 | 57.9     | <i>purA</i>              | AAL23186          | <i>Salmonella enterica</i>         | reduced virulence                        |
| GM000424 | 40.7     | <i>RNase E</i>           | ADX16885          | <i>Salmonella enterica</i>         | reduced virulence                        |
| GM000469 | 45.8     | <i>znuB</i>              | ACA68428          | <i>Yersinia pseudotuberculosis</i> | reduced virulence                        |
| GM000472 | 63.3     | <i>ubiquinol oxidase</i> | AAK26622          | <i>Blumeria graminis</i>           | chemistry target: resistance to chemical |
| GM000521 | 46.2     | <i>PSPTO_2691</i>        | AAO56193          | <i>Pseudomonas syringae</i>        | unaffected pathogenicity                 |
| GM000622 | 47.4     | <i>MoARG1</i>            | EHA55560          | <i>Magnaporthe oryzae</i>          | loss of pathogenicity                    |
| GM000653 | 47.5     | <i>pnp</i>               | AE004888_1        | <i>Pseudomonas aeruginosa</i>      | reduced virulence                        |
| GM000659 | 53.8     | <i>Bx-Prx</i>            | ABW81468          | <i>Bursaphelenchus xylophilus</i>  | loss of pathogenicity                    |
| GM000660 | 70.9     | <i>TRR1</i>              | AY796185          | <i>Cryptococcus neoformans</i>     | Lethal                                   |

|              |      |                  |            |                                            |                               |                |
|--------------|------|------------------|------------|--------------------------------------------|-------------------------------|----------------|
| GM0006<br>91 | 41.7 | <i>CovR</i>      | ACE75886   | <i>Streptococcus pyogenes</i>              | increased<br>(hypervirulence) | virulence      |
| GM0007<br>32 | 47.4 | <i>SSBX</i>      | AAW74693   | <i>Xanthomonas oryzae</i>                  | reduced virulence             |                |
| GM0007<br>65 | 60.0 | <i>HSP90</i>     | AAA02743   | <i>Saccharomyces cerevisiae</i>            | increased<br>(hypervirulence) | virulence      |
| GM0007<br>68 | 59.6 | <i>GyrA</i>      | BAD26622   | <i>Flavobacterium<br/>psychrophilum</i>    | chemistry target:<br>chemical | sensitivity to |
| Continued    |      |                  |            |                                            |                               |                |
| GM0007<br>92 | 43.2 | <i>argD</i>      | CBA23647   | <i>Erwinia amylovora</i>                   | reduced virulence             |                |
| GM0008<br>04 | 55.6 | <i>LonA</i>      | ABN73480   | <i>Actinobacillus<br/>pleuropneumoniae</i> | reduced virulence             |                |
| GM0008<br>05 | 53.3 | <i>ClpX</i>      | BAF67840   | <i>Staphylococcus aureus</i>               | reduced virulence             |                |
| GM0008<br>06 | 76.6 | <i>ClpP</i>      | BAA94668   | <i>Salmonella enterica</i>                 | reduced virulence             |                |
| GM0008<br>29 | 48.3 | <i>argH</i>      | ABD20820.1 | <i>Staphylococcus aureus</i>               | reduced virulence             |                |
| GM0008<br>55 | 57.1 | <i>LssD</i>      | CAD90950   | <i>Legionella pneumophila</i>              | reduced virulence             |                |
| GM0009<br>03 | 40.4 | <i>ADE2</i>      | CAA99327   | <i>Saccharomyces cerevisiae</i>            | reduced virulence             |                |
| GM0009<br>21 | 41.0 | <i>RNase III</i> | AAA92440   | <i>Salmonella enterica</i>                 | reduced virulence             |                |
| GM0009<br>63 | 49.0 | <i>recA</i>      | AAL00560   | <i>Streptococcus pneumoniae</i>            | reduced virulence             |                |
| GM0009<br>69 | 51.7 | <i>XC_2203</i>   | AAY49259   | <i>Xanthomonas campestris</i>              | reduced virulence             |                |
| GM0010<br>22 | 56.1 | <i>MGG_00383</i> | MGG_00383  | <i>Magnaporthe oryzae</i>                  | reduced virulence             |                |

**Supplemental Table S2. All the genes of *E. canis* YZ-1 identified in KEGG and TC system analysis****Please find the additional PDF file in the supplementary. Thanks!****Supplemental Table S3. SNPs (single nucleotide polymorphisms) analysis of *E. canis* YZ-1 and related *Ehrlichia* stains**

| Reference             | GenBank #       | St-s* | Sp-s | St-ns | Sp-ns | Pm-sp | Syn        | N-syn      | T-CDS SNP | In-genic | T-SNP      |
|-----------------------|-----------------|-------|------|-------|-------|-------|------------|------------|-----------|----------|------------|
| <i>E. chaffeensis</i> | CP000236        | 6     | 49   | 25    | 20    | 215   | 51,04<br>1 | 26,88<br>1 | 78,152    | 4,914    | 83,06<br>6 |
| <i>Ehrlichia</i> sp.  | NZ_CP007474     | 3     | 43   | 17    | 19    | 168   | 48,77<br>1 | 26,82<br>9 | 75,818    | 5,198    | 81,01<br>6 |
| <i>E. muris</i>       | CP006917        | 4     | 47   | 19    | 22    | 165   | 46,91<br>2 | 25,51<br>8 | 72,655    | 6,922    | 79,57<br>7 |
| <i>E. ruminantium</i> | CR767821        | 1     | 18   | 10    | 6     | 142   | 21,62<br>7 | 11,39<br>9 | 33,192    | 1,566    | 34,75<br>8 |
| <i>E. mineirensis</i> | NZ_CDGH01000070 | 3     | 88   | 19    | 38    | 174   | 34,77<br>8 | 22,41<br>7 | 57,502    | 23,823   | 81,32<br>5 |
| <i>E. canis</i>       | NC_007354       | 0     | 0    | 1     | 2     | 13    | 328        | 1,090      | 1,433     | 315      | 1,748      |

\*St-s: start-codon synonymous SNPs; Sp-s: stop-codon synonymous SNPs; St-ns, start-codon nonsynonymous SNPs; Sp-ns: stop-codon nonsynonymous SNPs; Pm-sp: premature stop-codon mutation; Syn: synonymous mutation inside the gene; N-syn: nonsynonymous mutations inside the gene; T-CDS SNP: total coding sequencing (CDS) SNP; In-genic: intergenic SNPs; T-SNP: total SNP.

**Supplemental Table S4. InDel (insertions and deletions) analysis of *E. canis* YZ-1 and related *Ehrlichia* stains**

| Reference             | GenBank #       | St-co ins* | CDS inside ins | Sp-co ins | St-co del | CDS inside del | Sp-co del |
|-----------------------|-----------------|------------|----------------|-----------|-----------|----------------|-----------|
| <i>E. chaffeensis</i> | CP000236        | 1          | 13             | 2         | 1         | 20             | 0         |
| <i>Ehrlichia</i> sp.  | NZ_CP007474     | 1          | 6              | 0         | 0         | 14             | 0         |
| <i>E. muris</i>       | CP006917        | 1          | 5              | 0         | 0         | 9              | 0         |
| <i>E. ruminantium</i> | CR767821        | 0          | 7              | 0         | 0         | 5              | 1         |
| <i>E. mineirensis</i> | NZ_CDGH01000070 | 1          | 9              | 0         | 1         | 9              | 0         |
| <i>E. canis</i>       | NC_007354       | 0          | 17             | 0         | 0         | 16             | 0         |

\*St-co ins: start-codon insertions; CDS inside ins: coding sequencing-inside insertion; Sp-co ins: stop-codon insertion; St-co del: start-codon deletion; CDS inside del: CDS-inside deletion; Sp-co del: stop-codon deletion.

**Supplemental Table S5. Mutation type caused by InDel (insertions and deletions) in *E. canis* YZ-1 and related *Ehrlichia* stains**

| Reference             | GenBank #        | Frame-shifted* | St-co | Sp-co | Premature sp | Effect | CDS indel | with | All CDS |
|-----------------------|------------------|----------------|-------|-------|--------------|--------|-----------|------|---------|
| <i>E. chaffeensis</i> | CP000236         | 13             | 0     | 0     | 0            | 24     | 37        |      | 1105    |
| <i>Ehrlichia</i> sp.  | NZ_CP007474      | 7              | 0     | 0     | 0            | 13     | 20        |      | 855     |
| <i>E. muris</i>       | CP006917         | 4              | 0     | 0     | 0            | 11     | 15        |      | 904     |
| <i>E. ruminantium</i> | CR767821         | 4              | 0     | 0     | 1            | 8      | 13        |      | 888     |
| <i>E. mineirensis</i> | NZ_CDBGH01000070 | 5              | 0     | 1     | 2            | 10     | 18        |      | 933     |
| <i>E. canis</i>       | NC_007354        | 15             | 0     | 0     | 3            | 7      | 25        |      | 925     |

\*Frame-shifted: frameshift mutations; St-co: start codon; Sp-co: stop codon; Premature sp: premature stop; Effect: no effects on open reading frame; CDS with indel: number of CDS with insertions or deletions.

**Supplemental Table S6. The SV types of *E. canis* YZ-1 and related *Ehrlichia* stains**

| Reference             | GenBank #        | SV type* |    |       |    |    |     |    |    |       |
|-----------------------|------------------|----------|----|-------|----|----|-----|----|----|-------|
|                       |                  | Tr       | Iv | Tr+Iv | De | Is | CID | DI | DD | Total |
| <i>E. chaffeensis</i> | CP000236         | 7        | 7  | 7     | 49 | 80 | 184 | 0  | 0  | 334   |
| <i>Ehrlichia</i> sp.  | NZ_CP007474      | 7        | 8  | 97    | 44 | 77 | 160 | 0  | 0  | 393   |
| <i>E. muris</i>       | CP006917         | 10       | 14 | 94    | 47 | 71 | 166 | 0  | 0  | 402   |
| <i>E. ruminantium</i> | CR767821         | 19       | 9  | 130   | 98 | 21 | 248 | 0  | 0  | 525   |
| <i>E. mineirensis</i> | NZ_CDBGH01000070 | 43       | 25 | 1     | 28 | 46 | 4   | 0  | 0  | 147   |
| <i>E. canis</i>       | NC_007354        | 1        | 10 | 4     | 13 | 13 | 1   | 0  | 0  | 42    |

\*Tr: translocation; Iv: inversion; Tr+Iv: Translocation + inversion; De: deletion; Is: insertion; CID: complex InDel, (The sequence corresponding to the position of the reference genome and the sample genome cannot be aligned. The reason may be that both the reference sequence and the studied sequence have been inserted in the specified region, or that one of them has been inserted or deleted in the overlapped region, or the variation is too large to be compared); DI: Duplicate Insertion; DD: Duplicate Deletion.

Figure S1

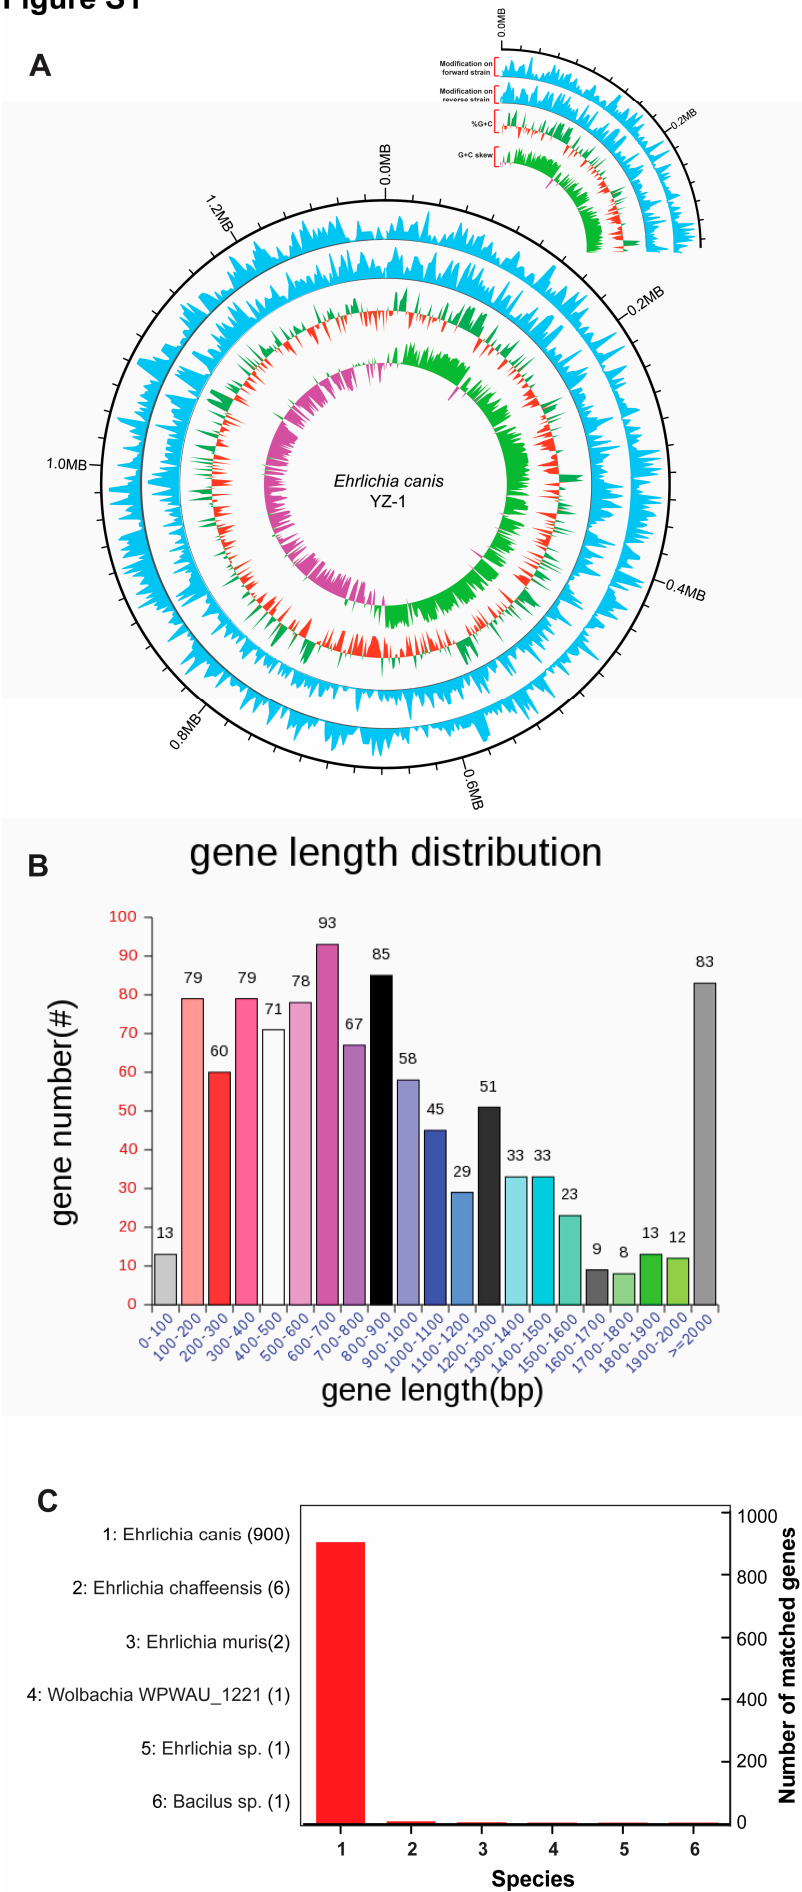

**Figure S1. The epigenetic modifications of *Ehrlichia canis* YZ-1.** (A) As indicated in the upright corner of the figure, the outermost track and the next track show the epigenetic modifications in the forward and reverse direction, together with the GC content in the next track and GC skew values in the inner track. (B) The predicted gene distribution of *E. canis* YZ-1. The number (Y-axis) and length in base-pair (bp) (X-axis) of the genes identified in *E. canis* YZ-1 were colored here. (C) The top 6 species matched with the *E. canis* YZ-1 in this study when BLASTed using the NCBI NR database.

Figure S2

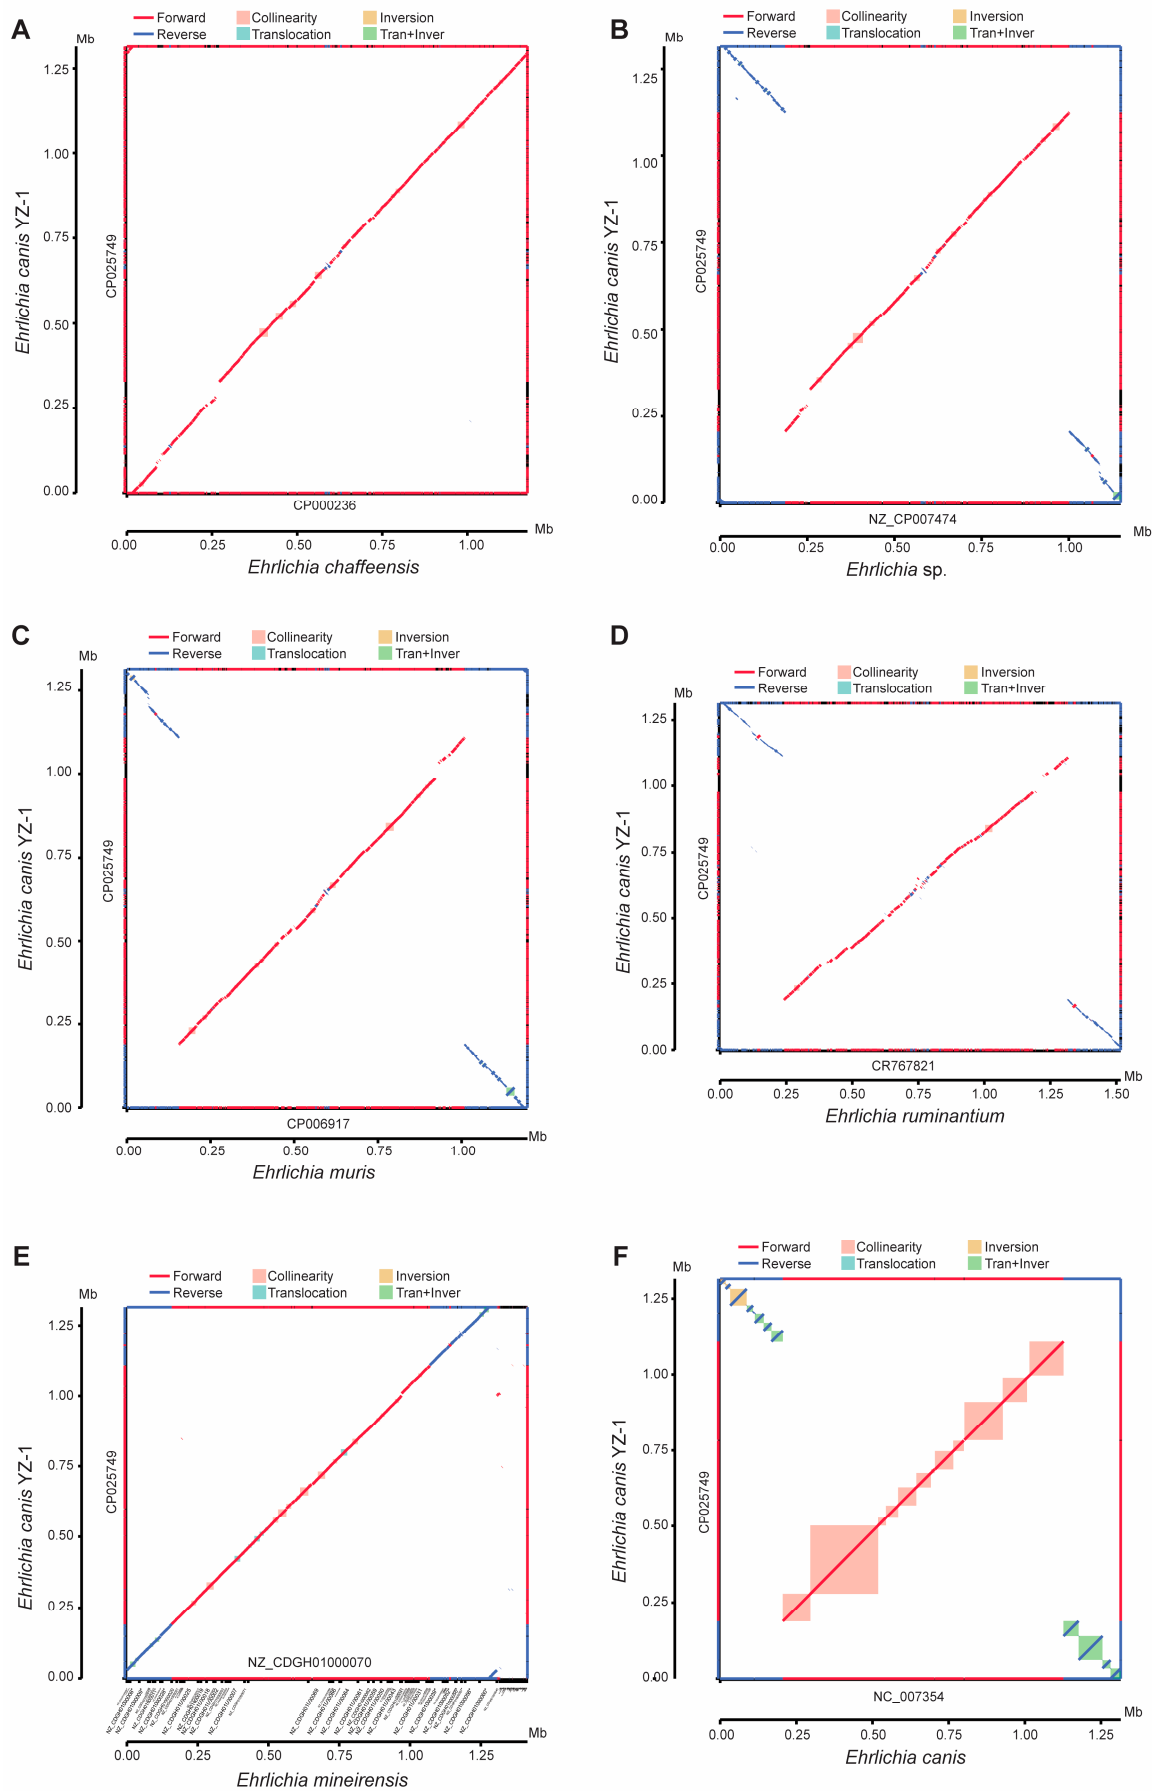

**Figure S2. Bidimensional synteny analysis of *Ehrlichia canis* YZ-1 with the reference sequences.** The bidimensional synteny analysis was performed on *E. canis* YZ1 from our study and *E. chaffeensis* (GenBank accession number CP000236) (A), *Ehrlichia* sp. (NZ\_CP007474) (B), *E. muris* (CP006917) (C), *E. ruminantium* (CR767821) (D), *E. mineirensis* (NZ\_CDGH01000070) (E), and *E. canis* (NC\_007354) (F) from NCBI, with collinearity (pink), inversion (orange), translocation (azure), and translocation + inversion (green).



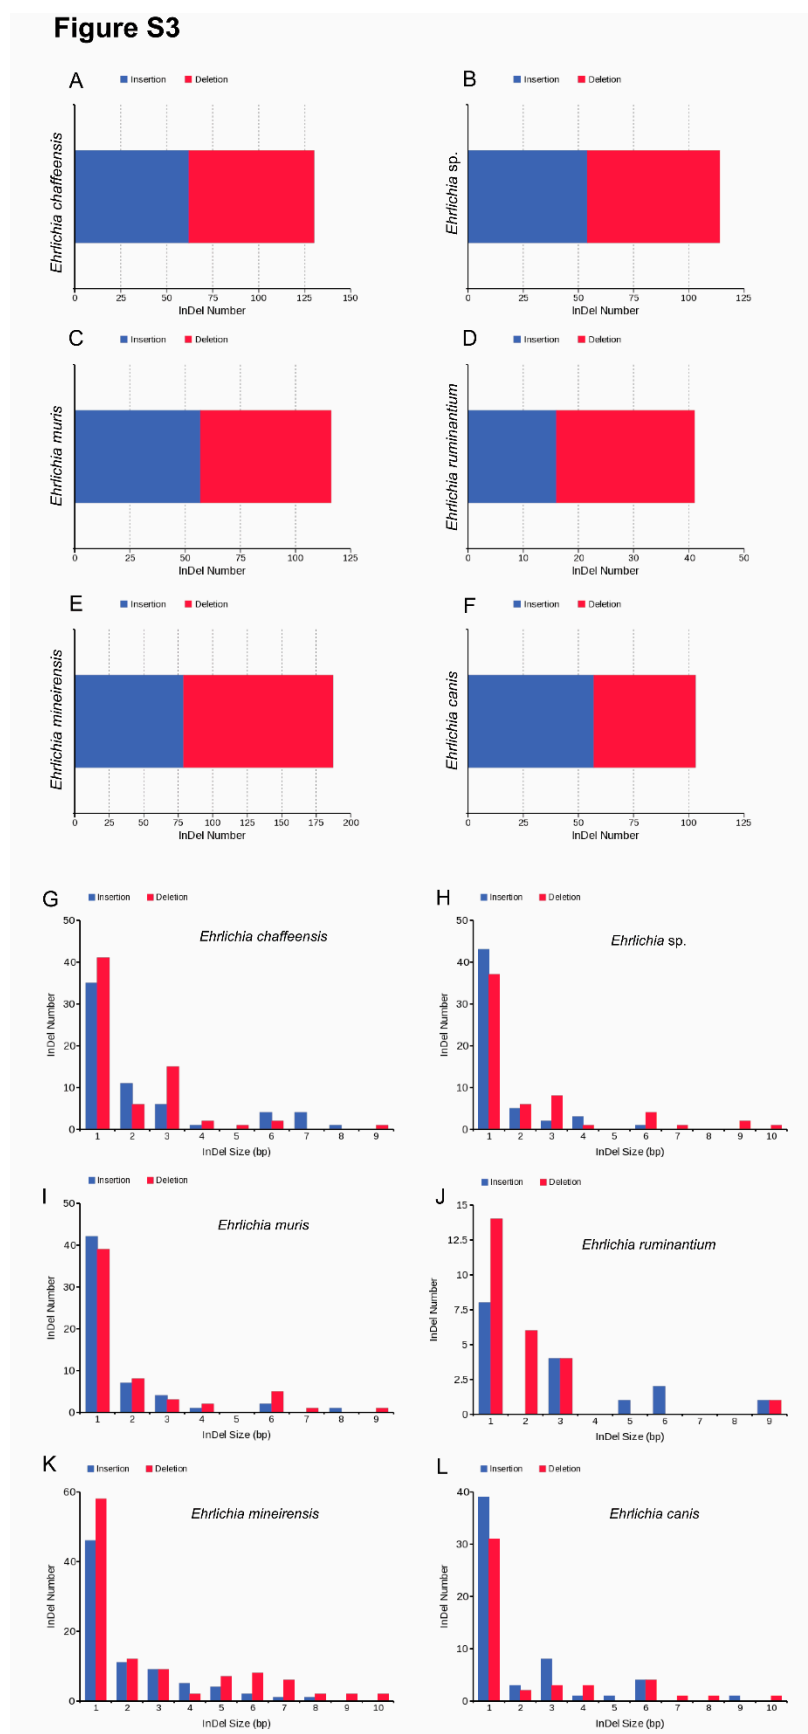

**Figure S3.** The comparative analysis of InDels between *Ehrlichia canis* YZ-1 and reference sequences. The number (A-F) and length (G-L) of insertion (blue) and deletion (red) mutations were aligned between *E. canis* YZ-1 from this

study and *Ehrlichia* references published before, including *E. chaffeensis* (GenBank accession number .CP000236) (**A and G**), *Ehrlichia* sp. (NZ\_CP007474) (**B and H**), *E. muris* (CP006917) (**C and I**), *E. ruminantium* (CR767821) (**D and J**), *E. mineirensis* (NZ\_CDGH01000070) (**E and K**), and *E. canis* (NC\_007354) (**F and L**).

**Figure S4**

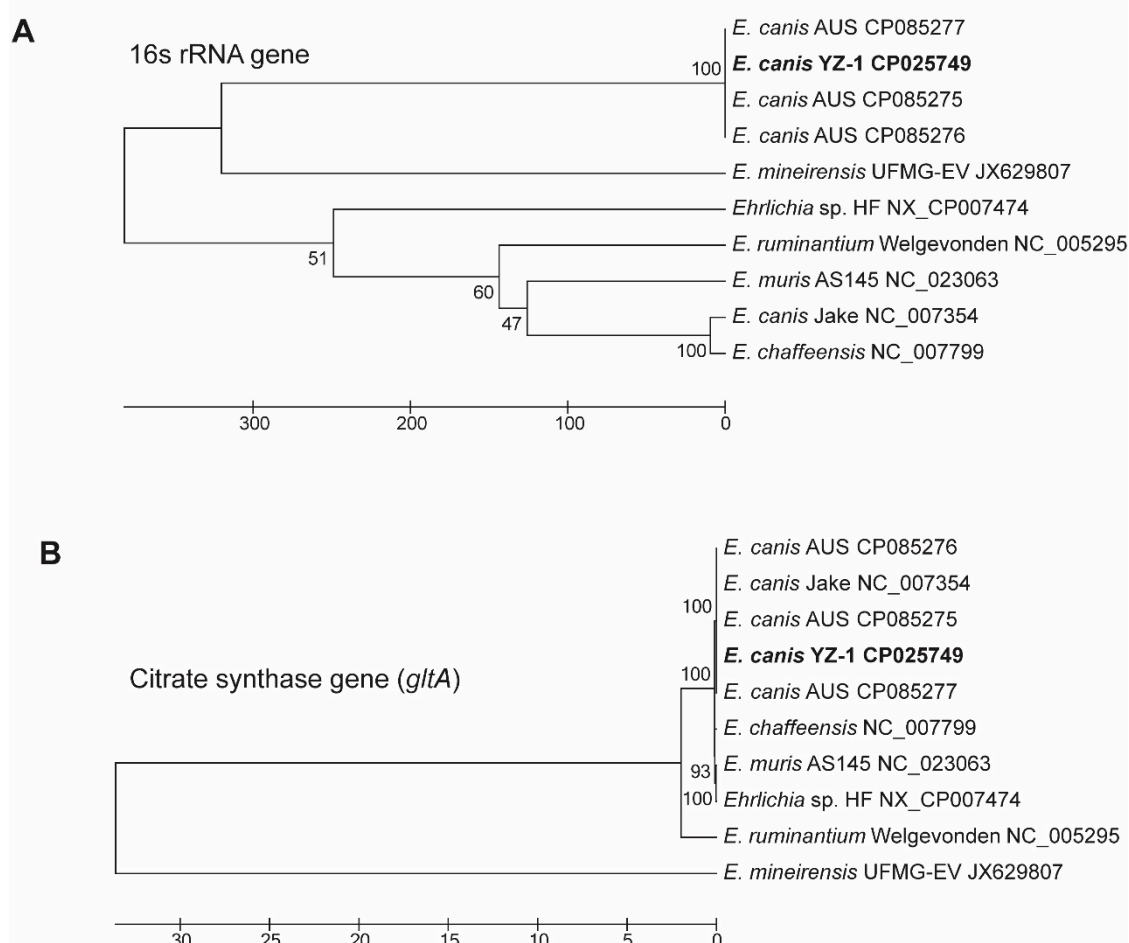

**Figure S4. Phylogenetic relationships of *Ehrlichia canis* YZ-1 and references.** The phylogenetic tree of *Ehrlichia canis* YZ-1 and related references was inferred on 16S rRNA gene (**A**) and Citrate synthase gene (*gltA*) (**B**) using the UPGMA method and conducted in MEGA6. The percentage of replicate trees in which the associated taxa clustered together in the bootstrap test (500 replicates) are shown next to the branches. The tree is drawn to scale, with branch lengths in the same units as those of the evolutionary distances used to infer the phylogenetic tree. The evolutionary distances were computed using the Maximum Composite Likelihood method and are in the units of the number of base substitutions per site. The rate variation among sites was modeled with a gamma distribution (shape parameter = 1).
