# Supplementary material for: Whole Genome Sequencing and Comparative Analysis of the First Ehrlichia canis Isolate in China
Source: MDPI journal article supplement (doi:10.3390/microorganisms12010125), 2024-01-08
Supplement: s1 [file s1]

| map number | Functional Category              | # of Gene | Gene #         | KO #   |
|------------|----------------------------------|-----------|----------------|--------|
| map00010   | Glycolysis / Gluconeogenesis     | 12        | EC-YZGM0001016 | K00134 |
|            |                                  |           | EC-YZGM000178  | K00161 |
|            |                                  |           | EC-YZGM000115  | K00162 |
|            |                                  |           | EC-YZGM000462  | K00382 |
|            |                                  |           | EC-YZGM000874  | K00382 |
|            |                                  |           | EC-YZGM000067  | K00627 |
|            |                                  |           | EC-YZGM000029  | K00927 |
|            |                                  |           | EC-YZGM000065  | K01623 |
|            |                                  |           | EC-YZGM000495  | K01689 |
|            |                                  |           | EC-YZGM000595  | K01803 |
|            |                                  |           | EC-YZGM000460  | K01834 |
|            |                                  |           | EC-YZGM000328  | K02446 |
| map00020   | Citrate cycle (TCA cycle)        | 16        | EC-YZGM000590  | K00024 |
|            |                                  |           | EC-YZGM000966  | K00031 |
|            |                                  |           | EC-YZGM000178  | K00161 |
|            |                                  |           | EC-YZGM000115  | K00162 |
|            |                                  |           | EC-YZGM000745  | K00164 |
|            |                                  |           | EC-YZGM000291  | K00239 |
|            |                                  |           | EC-YZGM000292  | K00240 |
|            |                                  |           | EC-YZGM000462  | K00382 |
|            |                                  |           | EC-YZGM000874  | K00382 |
|            |                                  |           | EC-YZGM000067  | K00627 |
|            |                                  |           | EC-YZGM000931  | K00658 |
|            |                                  |           | EC-YZGM000089  | K01647 |
|            |                                  |           | EC-YZGM000342  | K01679 |
|            |                                  |           | EC-YZGM000901  | K01681 |
|            |                                  |           | EC-YZGM000864  | K01902 |
|            |                                  |           | EC-YZGM000863  | K01903 |
| map00030   | Pentose phosphate pathway        | 7         | EC-YZGM000418  | K00615 |
|            |                                  |           | EC-YZGM000525  | K00616 |
|            |                                  |           | EC-YZGM000899  | K00948 |
|            |                                  |           | EC-YZGM000065  | K01623 |
|            |                                  |           | EC-YZGM000053  | K01783 |
|            |                                  |           | EC-YZGM000587  | K01808 |
|            |                                  |           | EC-YZGM000328  | K02446 |
| map00040   | Pentose and glucuronate intercon | 1         | EC-YZGM000053  | K01783 |
| map00051   | Fructose and mannose metabolisr  | 4         | EC-YZGM000152  | K00100 |
|            |                                  |           | EC-YZGM000065  | K01623 |
|            |                                  |           | EC-YZGM000595  | K01803 |
|            |                                  |           | EC-YZGM000328  | K02446 |
| map00061   | Fatty acid biosynthesis          | 7         | EC-YZGM000615  | K00059 |
|            |                                  |           | EC-YZGM000729  | K00208 |
|            |                                  |           | EC-YZGM000188  | K00645 |
|            |                                  |           | EC-YZGM000404  | K00648 |
|            |                                  |           | EC-YZGM000859  | K02371 |
|            |                                  |           | EC-YZGM000939  | K02372 |

|          |                                  |                  |        |
|----------|----------------------------------|------------------|--------|
| map00130 | Ubiquinone and other terpenoid-c | EC-YZGM000788    | K09458 |
|          |                                  | 6 EC-YZGM000586  | K00568 |
|          |                                  | EC-YZGM000396    | K03179 |
|          |                                  | EC-YZGM000397    | K03179 |
|          |                                  | EC-YZGM000879    | K03183 |
|          |                                  | EC-YZGM000001    | K03185 |
| map00190 | Oxidative phosphorylation        | EC-YZGM000781    | K06134 |
|          |                                  | 38 EC-YZGM000291 | K00239 |
|          |                                  | EC-YZGM000292    | K00240 |
|          |                                  | EC-YZGM000037    | K00329 |
|          |                                  | EC-YZGM000303    | K00329 |
|          |                                  | EC-YZGM000707    | K00330 |
|          |                                  | EC-YZGM000708    | K00331 |
|          |                                  | EC-YZGM000709    | K00332 |
|          |                                  | EC-YZGM000562    | K00333 |
|          |                                  | EC-YZGM000561    | K00334 |
|          |                                  | EC-YZGM000498    | K00335 |
|          |                                  | EC-YZGM000566    | K00336 |
|          |                                  | EC-YZGM000565    | K00337 |
|          |                                  | EC-YZGM000628    | K00338 |
|          |                                  | EC-YZGM000508    | K00339 |
|          |                                  | EC-YZGM000509    | K00340 |
|          |                                  | EC-YZGM000510    | K00341 |
|          |                                  | EC-YZGM000511    | K00342 |
|          |                                  | EC-YZGM000140    | K00343 |
|          |                                  | EC-YZGM000512    | K00343 |
|          |                                  | EC-YZGM000143    | K00356 |
|          |                                  | EC-YZGM000171    | K00356 |
|          |                                  | EC-YZGM000471    | K00411 |
|          |                                  | EC-YZGM000472    | K00412 |
|          |                                  | EC-YZGM000473    | K00413 |
|          |                                  | EC-YZGM000892    | K01507 |
|          |                                  | EC-YZGM000947    | K02108 |
|          |                                  | EC-YZGM000949    | K02109 |
|          |                                  | EC-YZGM000950    | K02109 |
|          |                                  | EC-YZGM000948    | K02110 |
|          |                                  | EC-YZGM000098    | K02111 |
|          |                                  | EC-YZGM000527    | K02112 |
|          |                                  | EC-YZGM000097    | K02113 |
|          |                                  | EC-YZGM000526    | K02114 |
|          |                                  | EC-YZGM000600    | K02115 |
|          |                                  | EC-YZGM000883    | K02274 |
|          |                                  | EC-YZGM000882    | K02275 |
|          |                                  | EC-YZGM000010    | K02276 |
|          |                                  | EC-YZGM000884    | K02301 |
| map00195 | Photosynthesis                   | 9 EC-YZGM000947  | K02108 |
|          |                                  | EC-YZGM000949    | K02109 |

|          |                       |                  |        |
|----------|-----------------------|------------------|--------|
|          |                       | EC-YZGM000950    | K02109 |
|          |                       | EC-YZGM000948    | K02110 |
|          |                       | EC-YZGM000098    | K02111 |
|          |                       | EC-YZGM000527    | K02112 |
|          |                       | EC-YZGM000097    | K02113 |
|          |                       | EC-YZGM000526    | K02114 |
|          |                       | EC-YZGM000600    | K02115 |
| map00230 | Purine metabolism     | 34 EC-YZGM000185 | K00088 |
|          |                       | EC-YZGM000413    | K00525 |
|          |                       | EC-YZGM000682    | K00526 |
|          |                       | EC-YZGM000940    | K00602 |
|          |                       | EC-YZGM000106    | K00764 |
|          |                       | EC-YZGM000386    | K00939 |
|          |                       | EC-YZGM000969    | K00940 |
|          |                       | EC-YZGM000299    | K00942 |
|          |                       | EC-YZGM000899    | K00948 |
|          |                       | EC-YZGM000653    | K00962 |
|          |                       | EC-YZGM000625    | K01129 |
|          |                       | EC-YZGM000123    | K01588 |
|          |                       | EC-YZGM000903    | K01589 |
|          |                       | EC-YZGM000764    | K01756 |
|          |                       | EC-YZGM000264    | K01923 |
|          |                       | EC-YZGM000315    | K01933 |
|          |                       | EC-YZGM000415    | K01939 |
|          |                       | EC-YZGM000886    | K01945 |
|          |                       | EC-YZGM000088    | K01951 |
|          |                       | EC-YZGM000323    | K01952 |
|          |                       | EC-YZGM000330    | K01952 |
|          |                       | EC-YZGM000052    | K02335 |
|          |                       | EC-YZGM000822    | K02337 |
|          |                       | EC-YZGM000888    | K02338 |
|          |                       | EC-YZGM000091    | K02340 |
|          |                       | EC-YZGM000722    | K02341 |
|          |                       | EC-YZGM000477    | K02342 |
|          |                       | EC-YZGM0001019   | K02343 |
|          |                       | EC-YZGM000389    | K03040 |
|          |                       | EC-YZGM000841    | K03043 |
|          |                       | EC-YZGM000840    | K03046 |
|          |                       | EC-YZGM000717    | K03060 |
|          |                       | EC-YZGM000712    | K03787 |
|          |                       | EC-YZGM000338    | K11175 |
| map00240 | Pyrimidine metabolism | 33 EC-YZGM000831 | K00226 |
|          |                       | EC-YZGM000597    | K00384 |
|          |                       | EC-YZGM000660    | K00384 |
|          |                       | EC-YZGM000413    | K00525 |
|          |                       | EC-YZGM000682    | K00526 |
|          |                       | EC-YZGM000569    | K00609 |

|          |                                   |                  |        |
|----------|-----------------------------------|------------------|--------|
|          |                                   | EC-YZGM000962    | K00762 |
|          |                                   | EC-YZGM000969    | K00940 |
|          |                                   | EC-YZGM000189    | K00943 |
|          |                                   | EC-YZGM000362    | K00945 |
|          |                                   | EC-YZGM000653    | K00962 |
|          |                                   | EC-YZGM000340    | K01465 |
|          |                                   | EC-YZGM000406    | K01485 |
|          |                                   | EC-YZGM000270    | K01494 |
|          |                                   | EC-YZGM000456    | K01520 |
|          |                                   | EC-YZGM000713    | K01591 |
|          |                                   | EC-YZGM000132    | K01937 |
|          |                                   | EC-YZGM000344    | K01955 |
|          |                                   | EC-YZGM000458    | K01956 |
|          |                                   | EC-YZGM000052    | K02335 |
|          |                                   | EC-YZGM000822    | K02337 |
|          |                                   | EC-YZGM000888    | K02338 |
|          |                                   | EC-YZGM000091    | K02340 |
|          |                                   | EC-YZGM000722    | K02341 |
|          |                                   | EC-YZGM000477    | K02342 |
|          |                                   | EC-YZGM001019    | K02343 |
|          |                                   | EC-YZGM000389    | K03040 |
|          |                                   | EC-YZGM000841    | K03043 |
|          |                                   | EC-YZGM000840    | K03046 |
|          |                                   | EC-YZGM000717    | K03060 |
|          |                                   | EC-YZGM000294    | K03465 |
|          |                                   | EC-YZGM000712    | K03787 |
|          |                                   | EC-YZGM000212    | K09903 |
| map00250 | Alanine, aspartate and glutamate  | 13 EC-YZGM000689 | K00260 |
|          |                                   | EC-YZGM000569    | K00609 |
|          |                                   | EC-YZGM000106    | K00764 |
|          |                                   | EC-YZGM000658    | K00812 |
|          |                                   | EC-YZGM000829    | K01755 |
|          |                                   | EC-YZGM000764    | K01756 |
|          |                                   | EC-YZGM000059    | K01915 |
|          |                                   | EC-YZGM000868    | K01915 |
|          |                                   | EC-YZGM000415    | K01939 |
|          |                                   | EC-YZGM000622    | K01940 |
|          |                                   | EC-YZGM000344    | K01955 |
|          |                                   | EC-YZGM000458    | K01956 |
|          |                                   | EC-YZGM000614    | K13821 |
| map00260 | Glycine, serine and threonine met | 7 EC-YZGM001021  | K00133 |
|          |                                   | EC-YZGM000462    | K00382 |
|          |                                   | EC-YZGM000874    | K00382 |
|          |                                   | EC-YZGM000287    | K00600 |
|          |                                   | EC-YZGM000061    | K00643 |
|          |                                   | EC-YZGM000881    | K00928 |
|          |                                   | EC-YZGM000701    | K00998 |

|          |                                     |    |               |        |
|----------|-------------------------------------|----|---------------|--------|
| map00270 | Cysteine and methionine metabol     | 4  | EC-YZGM001021 | K00133 |
|          |                                     |    | EC-YZGM001022 | K00789 |
|          |                                     |    | EC-YZGM000658 | K00812 |
|          |                                     |    | EC-YZGM000881 | K00928 |
| map00280 | Valine, leucine and isoleucine degl | 4  | EC-YZGM000462 | K00382 |
|          |                                     |    | EC-YZGM000874 | K00382 |
|          |                                     |    | EC-YZGM000444 | K01965 |
|          |                                     |    | EC-YZGM000548 | K01966 |
| map00290 | Valine, leucine and isoleucine bios | 5  | EC-YZGM000178 | K00161 |
|          |                                     |    | EC-YZGM000115 | K00162 |
|          |                                     |    | EC-YZGM000715 | K01869 |
|          |                                     |    | EC-YZGM000489 | K01870 |
|          |                                     |    | EC-YZGM000104 | K01873 |
| map00300 | Lysine biosynthesis                 | 11 | EC-YZGM001021 | K00133 |
|          |                                     |    | EC-YZGM000893 | K00145 |
|          |                                     |    | EC-YZGM000399 | K00215 |
|          |                                     |    | EC-YZGM000033 | K00674 |
|          |                                     |    | EC-YZGM000792 | K00821 |
|          |                                     |    | EC-YZGM000881 | K00928 |
|          |                                     |    | EC-YZGM000542 | K00930 |
|          |                                     |    | EC-YZGM000110 | K01439 |
|          |                                     |    | EC-YZGM000442 | K01586 |
|          |                                     |    | EC-YZGM000742 | K01714 |
| map00310 | Lysine degradation                  |    | EC-YZGM000027 | K01778 |
|          |                                     | 3  | EC-YZGM000745 | K00164 |
|          |                                     |    | EC-YZGM000931 | K00658 |
|          |                                     |    | EC-YZGM000656 | K01423 |
| map00330 | Arginine and proline metabolism     | 14 | EC-YZGM000893 | K00145 |
|          |                                     |    | EC-YZGM000689 | K00260 |
|          |                                     |    | EC-YZGM001018 | K00286 |
|          |                                     |    | EC-YZGM000050 | K00611 |
|          |                                     |    | EC-YZGM000619 | K00620 |
|          |                                     |    | EC-YZGM000658 | K00812 |
|          |                                     |    | EC-YZGM000792 | K00821 |
|          |                                     |    | EC-YZGM000542 | K00930 |
|          |                                     |    | EC-YZGM000406 | K01485 |
|          |                                     |    | EC-YZGM000829 | K01755 |
|          |                                     |    | EC-YZGM000059 | K01915 |
|          |                                     |    | EC-YZGM000868 | K01915 |
| map00340 | Histidine metabolism                |    | EC-YZGM000622 | K01940 |
|          |                                     |    | EC-YZGM000614 | K13821 |
|          |                                     | 2  | EC-YZGM000398 | K00492 |
|          |                                     |    | EC-YZGM000672 | K00599 |
| map00350 | Tyrosine metabolism                 | 3  | EC-YZGM000672 | K00599 |
|          |                                     |    | EC-YZGM000810 | K00680 |
|          |                                     |    | EC-YZGM000658 | K00812 |
| map00360 | Phenylalanine metabolism            | 1  | EC-YZGM000658 | K00812 |

|          |                                    |    |               |        |
|----------|------------------------------------|----|---------------|--------|
| map00361 | Chlorocyclohexane and chloroben    | 1  | EC-YZGM000398 | K00492 |
| map00362 | Benzoate degradation               | 2  | EC-YZGM000336 | K00449 |
|          |                                    |    | EC-YZGM000810 | K00680 |
| map00363 | Bisphenol degradation              | 2  | EC-YZGM000152 | K00100 |
|          |                                    |    | EC-YZGM000398 | K00492 |
| map00380 | Tryptophan metabolism              | 2  | EC-YZGM000745 | K00164 |
|          |                                    |    | EC-YZGM000128 | K01867 |
| map00400 | Phenylalanine, tyrosine and tryptc | 2  | EC-YZGM000821 | K00800 |
|          |                                    |    | EC-YZGM000658 | K00812 |
| map00401 | Novobiocin biosynthesis            | 1  | EC-YZGM000658 | K00812 |
| map00410 | beta-Alanine metabolism            | 1  | EC-YZGM000731 | K01578 |
| map00450 | Selenocompound metabolism          | 3  | EC-YZGM000597 | K00384 |
|          |                                    |    | EC-YZGM000660 | K00384 |
|          |                                    |    | EC-YZGM000880 | K01874 |
| map00460 | Cyanoamino acid metabolism         | 1  | EC-YZGM000287 | K00600 |
| map00480 | Glutathione metabolism             | 5  | EC-YZGM000966 | K00031 |
|          |                                    |    | EC-YZGM000760 | K00799 |
|          |                                    |    | EC-YZGM000337 | K01255 |
|          |                                    |    | EC-YZGM000090 | K01919 |
|          |                                    |    | EC-YZGM000310 | K01920 |
| map00500 | Starch and sucrose metabolism      | 1  | EC-YZGM000639 | K00975 |
| map00520 | Amino sugar and nucleotide sugar   | 1  | EC-YZGM000639 | K00975 |
| map00521 | Streptomycin biosynthesis          | 1  | EC-YZGM000693 | K01092 |
| map00550 | Peptidoglycan biosynthesis         | 1  | EC-YZGM000933 | K07258 |
| map00561 | Glycerolipid metabolism            | 3  | EC-YZGM000045 | K00655 |
|          |                                    |    | EC-YZGM000403 | K03621 |
|          |                                    |    | EC-YZGM000008 | K08591 |
| map00562 | Inositol phosphate metabolism      | 2  | EC-YZGM000693 | K01092 |
|          |                                    |    | EC-YZGM000595 | K01803 |
| map00564 | Glycerophospholipid metabolism     | 10 | EC-YZGM000313 | K00057 |
|          |                                    |    | EC-YZGM000045 | K00655 |
|          |                                    |    | EC-YZGM000214 | K00981 |
|          |                                    |    | EC-YZGM000942 | K00995 |
|          |                                    |    | EC-YZGM000701 | K00998 |
|          |                                    |    | EC-YZGM000809 | K01095 |
|          |                                    |    | EC-YZGM000696 | K01613 |
|          |                                    |    | EC-YZGM000700 | K01613 |
|          |                                    |    | EC-YZGM000403 | K03621 |
|          |                                    |    | EC-YZGM000008 | K08591 |
| map00591 | Linoleic acid metabolism           | 1  | EC-YZGM000152 | K00100 |
| map00620 | Pyruvate metabolism                | 8  | EC-YZGM000590 | K00024 |
|          |                                    |    | EC-YZGM000136 | K00029 |
|          |                                    |    | EC-YZGM000178 | K00161 |
|          |                                    |    | EC-YZGM000115 | K00162 |
|          |                                    |    | EC-YZGM000462 | K00382 |
|          |                                    |    | EC-YZGM000874 | K00382 |
|          |                                    |    | EC-YZGM000067 | K00627 |

|          |                                   |                  |        |
|----------|-----------------------------------|------------------|--------|
| map00623 | Toluene degradation               | EC-YZGM000305    | K01006 |
|          |                                   | 3 EC-YZGM000291  | K00239 |
|          |                                   | EC-YZGM000292    | K00240 |
| map00624 | Polycyclic aromatic hydrocarbon d | EC-YZGM000398    | K00492 |
|          |                                   | 3 EC-YZGM000336  | K00449 |
|          |                                   | EC-YZGM000398    | K00492 |
| map00625 | Chloroalkane and chloroalkene de  | EC-YZGM000672    | K00599 |
|          |                                   | 1 EC-YZGM000152  | K00100 |
|          |                                   | 2 EC-YZGM000398  | K00492 |
| map00626 | Naphthalene degradation           | EC-YZGM000810    | K00680 |
| map00627 | Aminobenzoate degradation         | 2 EC-YZGM000398  | K00492 |
|          |                                   | EC-YZGM000810    | K00680 |
|          |                                   | 6 EC-YZGM000590  | K00024 |
| map00630 | Glyoxylate and dicarboxylate met  | EC-YZGM000307    | K01091 |
|          |                                   | EC-YZGM000089    | K01647 |
|          |                                   | EC-YZGM000901    | K01681 |
| map00640 | Propanoate metabolism             | EC-YZGM000444    | K01965 |
|          |                                   | EC-YZGM000548    | K01966 |
|          |                                   | 5 EC-YZGM000731  | K01578 |
| map00642 | Ethylbenzene degradation          | EC-YZGM000864    | K01902 |
|          |                                   | EC-YZGM000863    | K01903 |
|          |                                   | EC-YZGM000444    | K01965 |
| map00650 | Butanoate metabolism              | EC-YZGM000548    | K01966 |
|          |                                   | 1 EC-YZGM000810  | K00680 |
|          |                                   | 5 EC-YZGM000152  | K00100 |
| map00660 | C5-Branched dibasic acid metabol  | EC-YZGM000178    | K00161 |
|          |                                   | EC-YZGM000115    | K00162 |
|          |                                   | EC-YZGM000291    | K00239 |
| map00670 | One carbon pool by folate         | EC-YZGM000292    | K00240 |
|          |                                   | 2 EC-YZGM000864  | K01902 |
|          |                                   | EC-YZGM000863    | K01903 |
| map00680 | Methane metabolism                | 7 EC-YZGM000287  | K00600 |
|          |                                   | EC-YZGM000940    | K00602 |
|          |                                   | EC-YZGM000801    | K00604 |
| map00710 | Carbon fixation in photosynthetic | EC-YZGM000300    | K01491 |
|          |                                   | EC-YZGM000492    | K01934 |
|          |                                   | EC-YZGM000294    | K03465 |
| map00680 | Methane metabolism                | EC-YZGM000338    | K11175 |
|          |                                   | 4 EC-YZGM000590  | K00024 |
|          |                                   | EC-YZGM000287    | K00600 |
| map00710 | Carbon fixation in photosynthetic | EC-YZGM000495    | K01689 |
|          |                                   | EC-YZGM000460    | K01834 |
|          |                                   | 11 EC-YZGM000590 | K00024 |
| map00710 | Carbon fixation in photosynthetic | EC-YZGM000136    | K00029 |
|          |                                   | EC-YZGM000418    | K00615 |
|          |                                   | EC-YZGM000658    | K00812 |
| map00710 | Carbon fixation in photosynthetic | EC-YZGM000029    | K00927 |
|          |                                   |                  |        |
|          |                                   |                  |        |

|          |                                   |    |               |        |
|----------|-----------------------------------|----|---------------|--------|
|          |                                   |    | EC-YZGM000305 | K01006 |
|          |                                   |    | EC-YZGM000065 | K01623 |
|          |                                   |    | EC-YZGM000053 | K01783 |
|          |                                   |    | EC-YZGM000595 | K01803 |
|          |                                   |    | EC-YZGM000587 | K01808 |
|          |                                   |    | EC-YZGM000328 | K02446 |
| map00720 | Carbon fixation pathways in proka | 11 | EC-YZGM000590 | K00024 |
|          |                                   |    | EC-YZGM000966 | K00031 |
|          |                                   |    | EC-YZGM000291 | K00239 |
|          |                                   |    | EC-YZGM000292 | K00240 |
|          |                                   |    | EC-YZGM000300 | K01491 |
|          |                                   |    | EC-YZGM000342 | K01679 |
|          |                                   |    | EC-YZGM000901 | K01681 |
|          |                                   |    | EC-YZGM000864 | K01902 |
|          |                                   |    | EC-YZGM000863 | K01903 |
|          |                                   |    | EC-YZGM000444 | K01965 |
|          |                                   |    | EC-YZGM000548 | K01966 |
| map00730 | Thiamine metabolism               | 7  | EC-YZGM000798 | K00788 |
|          |                                   |    | EC-YZGM000816 | K00941 |
|          |                                   |    | EC-YZGM000478 | K00946 |
|          |                                   |    | EC-YZGM000961 | K03148 |
|          |                                   |    | EC-YZGM000409 | K03153 |
|          |                                   |    | EC-YZGM000577 | K04487 |
|          |                                   |    | EC-YZGM000578 | K04487 |
| map00740 | Riboflavin metabolism             | 6  | EC-YZGM000196 | K00793 |
|          |                                   |    | EC-YZGM000704 | K00794 |
|          |                                   |    | EC-YZGM000024 | K01497 |
|          |                                   |    | EC-YZGM000100 | K02858 |
|          |                                   |    | EC-YZGM000130 | K11752 |
|          |                                   |    | EC-YZGM000927 | K11753 |
| map00750 | Vitamin B6 metabolism             | 2  | EC-YZGM000826 | K00275 |
|          |                                   |    | EC-YZGM000724 | K03474 |
| map00760 | Nicotinate and nicotinamide meta  | 6  | EC-YZGM000007 | K00767 |
|          |                                   |    | EC-YZGM000186 | K00858 |
|          |                                   |    | EC-YZGM000725 | K00969 |
|          |                                   |    | EC-YZGM000738 | K01950 |
|          |                                   |    | EC-YZGM000016 | K03517 |
|          |                                   |    | EC-YZGM000712 | K03787 |
| map00770 | Pantothenate and CoA biosynthes   | 6  | EC-YZGM000720 | K00859 |
|          |                                   |    | EC-YZGM000662 | K00954 |
|          |                                   |    | EC-YZGM000665 | K00997 |
|          |                                   |    | EC-YZGM000035 | K01598 |
|          |                                   |    | EC-YZGM000341 | K01922 |
|          |                                   |    | EC-YZGM000832 | K03525 |
| map00780 | Biotin metabolism                 | 6  | EC-YZGM000839 | K00652 |
|          |                                   |    | EC-YZGM000613 | K00833 |
|          |                                   |    | EC-YZGM000324 | K01012 |



|          |                                    |                  |        |
|----------|------------------------------------|------------------|--------|
|          |                                    | EC-YZGM000656    | K01423 |
|          |                                    | EC-YZGM000964    | K01935 |
|          |                                    | EC-YZGM000761    | K03524 |
| map00785 | Lipoic acid metabolism             | 2 EC-YZGM000446  | K03644 |
|          |                                    | EC-YZGM000339    | K03801 |
| map00790 | Folate biosynthesis                | 5 EC-YZGM000346  | K00796 |
|          |                                    | EC-YZGM000321    | K00950 |
|          |                                    | EC-YZGM000599    | K01495 |
|          |                                    | EC-YZGM000591    | K01633 |
|          |                                    | EC-YZGM000637    | K11754 |
| map00860 | Porphyrin and chlorophyll metabo   | 10 EC-YZGM000540 | K00228 |
|          |                                    | EC-YZGM000061    | K00643 |
|          |                                    | EC-YZGM000011    | K01599 |
|          |                                    | EC-YZGM000737    | K01698 |
|          |                                    | EC-YZGM000437    | K01719 |
|          |                                    | EC-YZGM000636    | K01749 |
|          |                                    | EC-YZGM000355    | K01772 |
|          |                                    | EC-YZGM000166    | K01885 |
|          |                                    | EC-YZGM000554    | K01885 |
|          |                                    | EC-YZGM000884    | K02301 |
| map00900 | Terpenoid backbone biosynthesis    | 8 EC-YZGM000513  | K00099 |
|          |                                    | EC-YZGM000411    | K00795 |
|          |                                    | EC-YZGM000675    | K00919 |
|          |                                    | EC-YZGM000120    | K00991 |
|          |                                    | EC-YZGM000119    | K01770 |
|          |                                    | EC-YZGM000057    | K02523 |
|          |                                    | EC-YZGM000515    | K03526 |
|          |                                    | EC-YZGM000457    | K03527 |
| map00903 | Limonene and pinene degradation    | 2 EC-YZGM000398  | K00492 |
|          |                                    | EC-YZGM000810    | K00680 |
| map00908 | Zeatin biosynthesis                | 1 EC-YZGM000529  | K00791 |
| map00910 | Nitrogen metabolism                | 3 EC-YZGM000689  | K00260 |
|          |                                    | EC-YZGM000059    | K01915 |
|          |                                    | EC-YZGM000868    | K01915 |
| map00950 | Isoquinoline alkaloid biosynthesis | 1 EC-YZGM000658  | K00812 |
| map00960 | Tropane, piperidine and pyridine a | 1 EC-YZGM000658  | K00812 |
| map00970 | Aminoacyl-tRNA biosynthesis        | 25 EC-YZGM000801 | K00604 |
|          |                                    | EC-YZGM000060    | K01866 |
|          |                                    | EC-YZGM000128    | K01867 |
|          |                                    | EC-YZGM0001011   | K01868 |
|          |                                    | EC-YZGM000715    | K01869 |
|          |                                    | EC-YZGM000489    | K01870 |
|          |                                    | EC-YZGM000865    | K01872 |
|          |                                    | EC-YZGM000104    | K01873 |
|          |                                    | EC-YZGM000880    | K01874 |
|          |                                    | EC-YZGM000532    | K01875 |
|          |                                    | EC-YZGM000308    | K01876 |

|          |                                     |                  |        |
|----------|-------------------------------------|------------------|--------|
|          |                                     | EC-YZGM000003    | K01878 |
|          |                                     | EC-YZGM000004    | K01879 |
|          |                                     | EC-YZGM000664    | K01881 |
|          |                                     | EC-YZGM000687    | K01883 |
|          |                                     | EC-YZGM000166    | K01885 |
|          |                                     | EC-YZGM000554    | K01885 |
|          |                                     | EC-YZGM000485    | K01887 |
|          |                                     | EC-YZGM000153    | K01889 |
|          |                                     | EC-YZGM000391    | K01890 |
|          |                                     | EC-YZGM000265    | K01892 |
|          |                                     | EC-YZGM000638    | K02433 |
|          |                                     | EC-YZGM000730    | K02434 |
|          |                                     | EC-YZGM000900    | K02435 |
|          |                                     | EC-YZGM000575    | K04566 |
| map00980 | Metabolism of xenobiotics by cytc   | 1 EC-YZGM000760  | K00799 |
| map00982 | Drug metabolism - cytochrome P4     | 1 EC-YZGM000760  | K00799 |
| map00983 | Drug metabolism - other enzymes     | 2 EC-YZGM000185  | K00088 |
|          |                                     | EC-YZGM000088    | K01951 |
| map01040 | Biosynthesis of unsaturated fatty ; | 1 EC-YZGM000615  | K00059 |
| map01051 | Biosynthesis of ansamycins          | 1 EC-YZGM000418  | K00615 |
| map02010 | ABC transporters                    | 5 EC-YZGM000758  | K02010 |
|          |                                     | EC-YZGM000400    | K02036 |
|          |                                     | EC-YZGM000269    | K02193 |
|          |                                     | EC-YZGM000135    | K09810 |
|          |                                     | EC-YZGM000753    | K09817 |
| map02020 | Two-component system                | 4 EC-YZGM000059  | K01915 |
|          |                                     | EC-YZGM000868    | K01915 |
|          |                                     | EC-YZGM000791    | K07716 |
|          |                                     | EC-YZGM000273    | K13598 |
| map03008 | Ribosome biogenesis in eukaryote    | 1 EC-YZGM000921  | K03685 |
| map03018 | RNA degradation                     | 4 EC-YZGM000653  | K00962 |
|          |                                     | EC-YZGM000968    | K00970 |
|          |                                     | EC-YZGM000495    | K01689 |
|          |                                     | EC-YZGM000424    | K08300 |
| map03020 | RNA polymerase                      | 4 EC-YZGM000389  | K03040 |
|          |                                     | EC-YZGM000841    | K03043 |
|          |                                     | EC-YZGM000840    | K03046 |
|          |                                     | EC-YZGM000717    | K03060 |
| map03030 | DNA replication                     | 12 EC-YZGM000277 | K01972 |
|          |                                     | EC-YZGM000408    | K02314 |
|          |                                     | EC-YZGM000678    | K02316 |
|          |                                     | EC-YZGM000052    | K02335 |
|          |                                     | EC-YZGM000822    | K02337 |
|          |                                     | EC-YZGM000888    | K02338 |
|          |                                     | EC-YZGM000091    | K02340 |
|          |                                     | EC-YZGM000722    | K02341 |
|          |                                     | EC-YZGM000477    | K02342 |

|          |                                     |                  |        |
|----------|-------------------------------------|------------------|--------|
|          |                                     | EC-YZGM001019    | K02343 |
|          |                                     | EC-YZGM000210    | K03469 |
|          |                                     | EC-YZGM000837    | K03470 |
| map03060 | Protein export                      | 2 EC-YZGM000627  | K03100 |
|          |                                     | EC-YZGM000926    | K03101 |
| map03410 | Base excision repair                | 6 EC-YZGM000618  | K01142 |
|          |                                     | EC-YZGM000277    | K01972 |
|          |                                     | EC-YZGM000052    | K02335 |
|          |                                     | EC-YZGM000222    | K03652 |
|          |                                     | EC-YZGM000967    | K07462 |
|          |                                     | EC-YZGM000767    | K10773 |
| map03420 | Nucleotide excision repair          | 4 EC-YZGM000277  | K01972 |
|          |                                     | EC-YZGM000052    | K02335 |
|          |                                     | EC-YZGM000769    | K03657 |
|          |                                     | EC-YZGM000204    | K03723 |
| map03430 | Mismatch repair                     | 11 EC-YZGM000277 | K01972 |
|          |                                     | EC-YZGM000822    | K02337 |
|          |                                     | EC-YZGM000888    | K02338 |
|          |                                     | EC-YZGM000091    | K02340 |
|          |                                     | EC-YZGM000722    | K02341 |
|          |                                     | EC-YZGM000477    | K02342 |
|          |                                     | EC-YZGM001019    | K02343 |
|          |                                     | EC-YZGM000031    | K03601 |
|          |                                     | EC-YZGM000172    | K03602 |
|          |                                     | EC-YZGM000769    | K03657 |
|          |                                     | EC-YZGM000967    | K07462 |
| map03440 | Homologous recombination            | 11 EC-YZGM000009 | K01159 |
|          |                                     | EC-YZGM000052    | K02335 |
|          |                                     | EC-YZGM000822    | K02337 |
|          |                                     | EC-YZGM000888    | K02338 |
|          |                                     | EC-YZGM000091    | K02340 |
|          |                                     | EC-YZGM000722    | K02341 |
|          |                                     | EC-YZGM000477    | K02342 |
|          |                                     | EC-YZGM001019    | K02343 |
|          |                                     | EC-YZGM000036    | K03655 |
|          |                                     | EC-YZGM000440    | K04066 |
|          |                                     | EC-YZGM000967    | K07462 |
| map04070 | Phosphatidylinositol signaling syst | 2 EC-YZGM000214  | K00981 |
|          |                                     | EC-YZGM000693    | K01092 |
| map04112 | Cell cycle - Caulobacter            | 5 EC-YZGM000804  | K01338 |
|          |                                     | EC-YZGM000806    | K01358 |
|          |                                     | EC-YZGM000408    | K02314 |
|          |                                     | EC-YZGM000791    | K07716 |
|          |                                     | EC-YZGM000936    | K11749 |
| map04122 | Sulfur relay system                 | 4 EC-YZGM000780  | K00566 |
|          |                                     | EC-YZGM000961    | K03148 |
|          |                                     | EC-YZGM000577    | K04487 |

|          |                            |   |               |        |
|----------|----------------------------|---|---------------|--------|
| map04146 | Peroxisome                 |   | EC-YZGM000578 | K04487 |
|          |                            | 3 | EC-YZGM000966 | K00031 |
|          |                            |   | EC-YZGM000731 | K01578 |
| map04260 | Cardiac muscle contraction |   | EC-YZGM000448 | K04564 |
|          |                            | 3 | EC-YZGM000471 | K00411 |
|          |                            |   | EC-YZGM000472 | K00412 |
| map04724 | Glutamatergic synapse      |   | EC-YZGM000473 | K00413 |
|          |                            | 2 | EC-YZGM000059 | K01915 |
|          |                            |   | EC-YZGM000868 | K01915 |
| map05010 | Alzheimer's disease        | 4 | EC-YZGM001016 | K00134 |
|          |                            |   | EC-YZGM000471 | K00411 |
|          |                            |   | EC-YZGM000472 | K00412 |
| map05012 | Parkinson's disease        |   | EC-YZGM000473 | K00413 |
|          |                            | 3 | EC-YZGM000471 | K00411 |
|          |                            |   | EC-YZGM000472 | K00412 |
| map05016 | Huntington's disease       |   | EC-YZGM000473 | K00413 |
|          |                            | 4 | EC-YZGM000471 | K00411 |
|          |                            |   | EC-YZGM000472 | K00412 |
| map05211 | Renal cell carcinoma       |   | EC-YZGM000473 | K00413 |
|          |                            |   | EC-YZGM000448 | K04564 |
|          |                            | 1 | EC-YZGM000342 | K01679 |

## Gene

GAPDH, gapA  
PDHA, pdhA  
PDHB, pdhB  
DLD, lpd, pdhD  
DLD, lpd, pdhD  
DLAT, aceF, pdhC  
PGK, pgk  
ALDO, fbaB  
ENO, eno  
TPI, tpiA  
PGAM, gpm  
glpX  
mdh  
IDH1, IDH2, icd  
PDHA, pdhA  
PDHB, pdhB  
OGDH, sucA  
sdhA  
sdhB  
DLD, lpd, pdhD  
DLD, lpd, pdhD  
DLAT, aceF, pdhC  
DLST, sucB  
CS, gltA  
E4.2.1.2B, fumC  
ACO, acnA  
sucD  
sucC  
E2.2.1.1, tktA, tktB  
E2.2.1.2, talA, talB  
PRPS, prsA  
ALDO, fbaB  
rpe, RPE  
E5.3.1.6B, rpiB  
glpX  
rpe, RPE  
E1.1.1.-  
ALDO, fbaB  
TPI, tpiA  
glpX  
fabG  
fabI  
fabD  
fabH  
fabK  
fabZ

fabF  
ubiG  
ubiA  
ubiA  
ubiE  
ubiH  
COQ7  
sdhA  
sdhB  
E1.6.5.3  
E1.6.5.3  
nuoA  
nuoB  
nuoC  
nuoD  
nuoE  
nuoF  
nuoG  
nuoH  
nuoI  
nuoJ  
nuoK  
nuoL  
nuoM  
nuoN  
nuoN  
E1.6.99.3  
E1.6.99.3  
RIP1, UQCRFS1, petA  
CYTB, petB  
CYT1, CYC1, petC  
E3.6.1.1, ppa  
ATPF0A, atpB  
ATPF0B, atpF  
ATPF0B, atpF  
ATPF0C, atpE  
ATPF1A, atpA  
ATPF1B, atpD  
ATPF1D, atpH  
ATPF1E, atpC  
ATPF1G, atpG  
coxA  
coxB  
coxC  
cyoE  
ATPF0A, atpB  
ATPF0B, atpF

ATPF0B, atpF  
ATPF0C, atpE  
ATPF1A, atpA  
ATPF1B, atpD  
ATPF1D, atpH  
ATPF1E, atpC  
ATPF1G, atpG  
E1.1.1.205, guaB  
E1.17.4.1A, nrdA, nrdE  
E1.17.4.1B, nrdB, nrdF  
purH  
E2.4.2.14, purF  
E2.7.4.3, adk  
E2.7.4.6, ndk  
E2.7.4.8, gmk  
PRPS, prsA  
pnp, PNPT1  
dgt  
purE  
purK  
E4.3.2.2, purB  
purC  
purM  
E6.3.4.4, purA  
purD  
E6.3.5.2, guaA  
E6.3.5.3, purL  
E6.3.5.3, purL  
DPO1, polA  
DPO3A1, dnaE  
DPO3B, dnaN  
DPO3D1, holA  
DPO3D2, holB  
DPO3E, dnaQ  
DPO3G, dnaX  
rpoA  
rpoB  
rpoC  
rpoZ  
surE  
purN  
pyrD  
E1.8.1.9, trxB  
E1.8.1.9, trxB  
E1.17.4.1A, nrdA, nrdE  
E1.17.4.1B, nrdB, nrdF  
pyrB, PYR2

pyrE  
E2.7.4.6, ndk  
E2.7.4.9, tmk  
cmk  
pnp, PNPT1  
URA4, pyrC  
E3.5.4.1, codA  
E3.5.4.13, dcd  
E3.6.1.23, dut  
pyrF  
E6.3.4.2, pyrG  
carB, CPA2  
carA, CPA1  
DPO1, polA  
DPO3A1, dnaE  
DPO3B, dnaN  
DPO3D1, holA  
DPO3D2, holB  
DPO3E, dnaQ  
DPO3G, dnaX  
rpoA  
rpoB  
rpoC  
rpoZ  
E2.1.1.148, thyX, thy1  
surE  
pyrH  
E1.4.1.2  
pyrB, PYR2  
E2.4.2.14, purF  
E2.6.1.1A, aspB  
argH, ASL  
E4.3.2.2, purB  
E6.3.1.2, glnA  
E6.3.1.2, glnA  
E6.3.4.4, purA  
E6.3.4.5, argG  
carB, CPA2  
carA, CPA1  
putA  
E1.2.1.11, asd  
DLD, lpd, pdhD  
DLD, lpd, pdhD  
E2.1.2.1, glyA  
E2.3.1.37, ALAS  
E2.7.2.4, lysC  
E2.7.8.8, pssA



E1.2.1.11, asd  
E2.5.1.6, metK  
E2.6.1.1A, aspB  
E2.7.2.4, lysC  
DLD, lpd, pdhD  
DLD, lpd, pdhD  
PCCA, pccA  
PCCB, pccB  
PDHA, pdhA  
PDHB, pdhB  
LARS, leuS  
IARS, ileS  
VARs, valS  
E1.2.1.11, asd  
argC  
dapB  
dapD  
argD  
E2.7.2.4, lysC  
argB  
dapE  
lysA  
dapA  
dapF  
OGDH, sucA  
DLST, sucB  
E3.4.-.-  
argC  
E1.4.1.2  
E1.5.1.2, proC  
OTC, argF, argI  
argJ  
E2.6.1.1A, aspB  
argD  
argB  
E3.5.4.1, codA  
argH, ASL  
E6.3.1.2, glnA  
E6.3.1.2, glnA  
E6.3.4.5, argG  
putA  
E1.14.13.-  
E2.1.1.-  
E2.1.1.-  
E2.3.1.-  
E2.6.1.1A, aspB  
E2.6.1.1A, aspB

E1.14.13.-  
pcaH  
E2.3.1.-  
E1.1.1.-  
E1.14.13.-  
OGDH, sucA  
WARS, trpS  
aroA  
E2.6.1.1A, aspB  
E2.6.1.1A, aspB  
E4.1.1.9, MLYCD  
E1.8.1.9, trxB  
E1.8.1.9, trxB  
MARS, metG  
E2.1.2.1, glyA  
IDH1, IDH2, icd  
E2.5.1.18, gst  
CARP, pepA  
gshA  
E6.3.2.3, gshB  
glgC  
glgC  
E3.1.3.25, IMPA, suhB  
dacC, dacA, dacD  
plsC  
plsX  
plsY  
E3.1.3.25, IMPA, suhB  
TPI, tpiA  
gpsA  
plsC  
E2.7.7.41, CDS1, cdsA  
E2.7.8.5, pgsA  
E2.7.8.8, pssA  
pgpA  
E4.1.1.65, psd  
E4.1.1.65, psd  
plsX  
plsY  
E1.1.1.-  
mdh  
E1.1.1.40, maeB  
PDHA, pdhA  
PDHB, pdhB  
DLD, lpd, pdhD  
DLD, lpd, pdhD  
DLAT, aceF, pdhC

ppdK  
sdhA  
sdhB  
E1.14.13.-  
pcaH  
E1.14.13.-  
E2.1.1.-  
E1.1.1.-  
E1.14.13.-  
E2.3.1.-  
E1.14.13.-  
E2.3.1.-  
mdh  
E3.1.3.18, gph  
CS, gltA  
ACO, acnA  
PCCA, pccA  
PCCB, pccB  
E4.1.1.9, MLYCD  
sucD  
sucC  
PCCA, pccA  
PCCB, pccB  
E2.3.1.-  
E1.1.1.-  
PDHA, pdhA  
PDHB, pdhB  
sdhA  
sdhB  
sucD  
sucC  
E2.1.2.1, glyA  
purH  
MTFMT, fmt  
fold  
E6.3.3.2  
E2.1.1.148, thyX, thy1  
purN  
mdh  
E2.1.2.1, glyA  
ENO, eno  
PGAM, gpm  
mdh  
E1.1.1.40, maeB  
E2.2.1.1, tktA, tktB  
E2.6.1.1A, aspB  
PGK, pgk

ppdK  
ALDO, fbaB  
rpe, RPE  
TPI, tpiA  
E5.3.1.6B, rpiB  
glpX  
mdh  
IDH1, IDH2, icd  
sdhA  
sdhB  
fold  
E4.2.1.2B, fumC  
ACO, acnA  
sucD  
sucC  
PCCA, pccA  
PCCB, pccB  
thiE  
thiD  
thiL  
thiF  
thiO  
iscS, NFS1  
iscS, NFS1  
ribE, RIB5  
ribH, RIB4  
ribA, RIB1  
ribB, RIB3  
ribD  
ribF  
pdxH, PNPO  
pdxJ  
E2.4.2.19, nadC  
E2.7.1.23  
nadD  
E6.3.5.1, NADSYN1, QNS1, nadE  
nadA  
surE  
coaE  
E2.7.7.3A, coaD, kdtB  
acpS  
PPCDC, coaC  
PPCS, coaB  
coaX  
bioF  
E2.6.1.62, bioA  
E2.8.1.6, bioB

E3.4.-.-  
bioD  
birA  
lipA  
lipB  
folP  
folK  
E3.5.4.16, folE  
folB  
folC  
hemF, CPOX  
E2.3.1.37, ALAS  
hemE, UROD  
hemB, ALAD  
hemD, UROS  
hemC, HMBS  
hemH, FECH  
EARS, gltX  
EARS, gltX  
cyoE  
dxr  
ispA  
ispE  
ispD  
ispF  
ispB  
E1.17.7.1, gcpE, ispG  
E1.17.1.2, lytB, ispH  
E1.14.13.-  
E2.3.1.-  
miaA, TRIT1  
E1.4.1.2  
E6.3.1.2, glnA  
E6.3.1.2, glnA  
E2.6.1.1A, aspB  
E2.6.1.1A, aspB  
MTFMT, fmt  
YARS, tyrS  
WARS, trpS  
TARS, thrS  
LARS, leuS  
IARS, ileS  
AARS, alaS  
VARs, valS  
MARs, metG  
SARS, serS  
DARS, aspS

glyQ  
glyS  
PARS, proS  
CARS, cysS  
EARS, gltX  
EARS, gltX  
RARS, argS  
FARSA, pheS  
FARSB, pheT  
HARS, hisS  
gatA  
gatB  
gatC  
lysK  
E2.5.1.18, gst  
E2.5.1.18, gst  
E1.1.1.205, guaB  
E6.3.5.2, guaA  
fabG  
E2.2.1.1, tktA, tktB  
afuC, fbpC  
pstB  
ccmA  
ABC.LPT.A, lolD  
znuC  
E6.3.1.2, glnA  
E6.3.1.2, glnA  
pleC  
ntrY  
rnc, DROSHA, RNT1  
pnp, PNPT1  
pcnB  
ENO, eno  
rne  
rpoA  
rpoB  
rpoC  
rpoZ  
E6.5.1.2, ligA, ligB  
dnaB  
dnaG  
DPO1, polA  
DPO3A1, dnaE  
DPO3B, dnaN  
DPO3D1, holA  
DPO3D2, holB  
DPO3E, dnaQ

DPO3G, dnaX  
E3.1.26.4A, RNASEH1, rnhA  
rnhB  
lepB  
lspA  
E3.1.11.2, xthA  
E6.5.1.2, ligA, ligB  
DPO1, polA  
MPG  
recJ  
NTH  
E6.5.1.2, ligA, ligB  
DPO1, polA  
uvrD, pcrA  
mfd  
E6.5.1.2, ligA, ligB  
DPO3A1, dnaE  
DPO3B, dnaN  
DPO3D1, holA  
DPO3D2, holB  
DPO3E, dnaQ  
DPO3G, dnaX  
xseA  
xseB  
uvrD, pcrA  
recJ  
ruvC  
DPO1, polA  
DPO3A1, dnaE  
DPO3B, dnaN  
DPO3D1, holA  
DPO3D2, holB  
DPO3E, dnaQ  
DPO3G, dnaX  
recG  
priA  
recJ  
E2.7.7.41, CDS1, cdsA  
E3.1.3.25, IMPA, suhB  
lon  
clpP, CLPP  
dnaB  
pleC  
rseP  
mnmA, trmU, TRMU  
thiF  
iscS, NFS1

iscS, NFS1  
IDH1, IDH2, icd  
E4.1.1.9, MLYCD  
E1.15.1.1A, sodA, sodB, SOD2  
RIP1, UQCRFS1, petA  
CYTB, petB  
CYT1, CYC1, petC  
E6.3.1.2, glnA  
E6.3.1.2, glnA  
GAPDH, gapA  
RIP1, UQCRFS1, petA  
CYTB, petB  
CYT1, CYC1, petC  
RIP1, UQCRFS1, petA  
CYTB, petB  
CYT1, CYC1, petC  
RIP1, UQCRFS1, petA  
CYTB, petB  
CYT1, CYC1, petC  
E1.15.1.1A, sodA, sodB, SOD2  
E4.2.1.2B, fumC



## KO definition

glyceraldehyde 3-phosphate dehydrogenase  
pyruvate dehydrogenase E1 component subunit alpha  
pyruvate dehydrogenase E1 component subunit beta  
dihydrolipoamide dehydrogenase  
dihydrolipoamide dehydrogenase  
pyruvate dehydrogenase E2 component (dihydrolipoamide acetyltransferase)  
phosphoglycerate kinase  
fructose-bisphosphate aldolase, class I  
enolase  
triosephosphate isomerase (TIM)  
phosphoglycerate mutase  
fructose-1,6-bisphosphatase II  
malate dehydrogenase  
isocitrate dehydrogenase  
pyruvate dehydrogenase E1 component subunit alpha  
pyruvate dehydrogenase E1 component subunit beta  
2-oxoglutarate dehydrogenase E1 component  
succinate dehydrogenase flavoprotein subunit  
succinate dehydrogenase iron-sulfur protein  
dihydrolipoamide dehydrogenase  
dihydrolipoamide dehydrogenase  
pyruvate dehydrogenase E2 component (dihydrolipoamide acetyltransferase)  
2-oxoglutarate dehydrogenase E2 component (dihydrolipoamide succinyltransferase)  
citrate synthase  
fumarate hydratase, class II  
aconitate hydratase 1  
succinyl-CoA synthetase alpha subunit  
succinyl-CoA synthetase beta subunit  
transketolase  
transaldolase  
ribose-phosphate pyrophosphokinase  
fructose-bisphosphate aldolase, class I  
ribulose-phosphate 3-epimerase  
ribose 5-phosphate isomerase B  
fructose-1,6-bisphosphatase II  
ribulose-phosphate 3-epimerase  
--  
fructose-bisphosphate aldolase, class I  
triosephosphate isomerase (TIM)  
fructose-1,6-bisphosphatase II  
3-oxoacyl-[acyl-carrier protein] reductase  
enoyl-[acyl-carrier protein] reductase I  
[acyl-carrier-protein] S-malonyltransferase  
3-oxoacyl-[acyl-carrier-protein] synthase III  
enoyl-[acyl carrier protein] reductase II  
3R-hydroxymyristoyl ACP dehydrase

3-oxoacyl-[acyl-carrier-protein] synthase II  
3-demethylubiquinone-9 3-methyltransferase  
4-hydroxybenzoate octaprenyltransferase  
4-hydroxybenzoate octaprenyltransferase  
ubiquinone/menaquinone biosynthesis methyltransferase  
2-octaprenyl-6-methoxyphenol hydroxylase  
ubiquinone biosynthesis monooxygenase Coq7  
succinate dehydrogenase flavoprotein subunit  
succinate dehydrogenase iron-sulfur protein  
NADH dehydrogenase  
NADH dehydrogenase  
NADH dehydrogenase I subunit A  
NADH dehydrogenase I subunit B  
NADH dehydrogenase I subunit C  
NADH dehydrogenase I subunit D  
NADH dehydrogenase I subunit E  
NADH dehydrogenase I subunit F  
NADH dehydrogenase I subunit G  
NADH dehydrogenase I subunit H  
NADH dehydrogenase I subunit I  
NADH dehydrogenase I subunit J  
NADH dehydrogenase I subunit K  
NADH dehydrogenase I subunit L  
NADH dehydrogenase I subunit M  
NADH dehydrogenase I subunit N  
NADH dehydrogenase I subunit N  
NADH dehydrogenase  
NADH dehydrogenase  
ubiquinol-cytochrome c reductase iron-sulfur subunit  
ubiquinol-cytochrome c reductase cytochrome b subunit  
ubiquinol-cytochrome c reductase cytochrome c1 subunit  
inorganic pyrophosphatase  
F-type H<sup>+</sup>-transporting ATPase subunit a  
F-type H<sup>+</sup>-transporting ATPase subunit b  
F-type H<sup>+</sup>-transporting ATPase subunit b  
F-type H<sup>+</sup>-transporting ATPase subunit c  
F-type H<sup>+</sup>-transporting ATPase subunit alpha  
F-type H<sup>+</sup>-transporting ATPase subunit beta  
F-type H<sup>+</sup>-transporting ATPase subunit delta  
F-type H<sup>+</sup>-transporting ATPase subunit epsilon  
F-type H<sup>+</sup>-transporting ATPase subunit gamma  
cytochrome c oxidase subunit I  
cytochrome c oxidase subunit II  
cytochrome c oxidase subunit III  
protoheme IX farnesyltransferase  
F-type H<sup>+</sup>-transporting ATPase subunit a  
F-type H<sup>+</sup>-transporting ATPase subunit b

F-type H<sup>+</sup>-transporting ATPase subunit b  
F-type H<sup>+</sup>-transporting ATPase subunit c  
F-type H<sup>+</sup>-transporting ATPase subunit alpha  
F-type H<sup>+</sup>-transporting ATPase subunit beta  
F-type H<sup>+</sup>-transporting ATPase subunit delta  
F-type H<sup>+</sup>-transporting ATPase subunit epsilon  
F-type H<sup>+</sup>-transporting ATPase subunit gamma  
IMP dehydrogenase  
ribonucleoside-diphosphate reductase alpha chain  
ribonucleoside-diphosphate reductase beta chain  
phosphoribosylaminoimidazolecarboxamide formyltransferase / IMP cyclohydrolase  
amidophosphoribosyltransferase  
adenylate kinase  
nucleoside-diphosphate kinase  
guanylate kinase  
ribose-phosphate pyrophosphokinase  
polyribonucleotide nucleotidyltransferase  
dGTPase  
5-(carboxyamino)imidazole ribonucleotide mutase  
5-(carboxyamino)imidazole ribonucleotide synthase  
adenylosuccinate lyase  
phosphoribosylaminoimidazole-succinocarboxamide synthase  
phosphoribosylformylglycinamide cyclo-ligase  
adenylosuccinate synthase  
phosphoribosylamine--glycine ligase  
GMP synthase (glutamine-hydrolysing)  
phosphoribosylformylglycinamide synthase  
phosphoribosylformylglycinamide synthase  
DNA polymerase I  
DNA polymerase III subunit alpha  
DNA polymerase III subunit beta  
DNA polymerase III subunit delta  
DNA polymerase III subunit delta'  
DNA polymerase III subunit epsilon  
DNA polymerase III subunit gamma/tau  
DNA-directed RNA polymerase subunit alpha  
DNA-directed RNA polymerase subunit beta  
DNA-directed RNA polymerase subunit beta'  
DNA-directed RNA polymerase subunit omega  
5'-nucleotidase  
phosphoribosylglycinamide formyltransferase 1  
dihydroorotate dehydrogenase (fumarate)  
thioredoxin reductase (NADPH)  
thioredoxin reductase (NADPH)  
ribonucleoside-diphosphate reductase alpha chain  
ribonucleoside-diphosphate reductase beta chain  
aspartate carbamoyltransferase catalytic subunit

orotate phosphoribosyltransferase  
nucleoside-diphosphate kinase  
dTMP kinase  
cytidylate kinase  
polyribonucleotide nucleotidyltransferase  
dihydroorotase  
cytosine deaminase  
dCTP deaminase  
dUTP pyrophosphatase  
orotidine-5'-phosphate decarboxylase  
CTP synthase  
carbamoyl-phosphate synthase large subunit  
carbamoyl-phosphate synthase small subunit  
DNA polymerase I  
DNA polymerase III subunit alpha  
DNA polymerase III subunit beta  
DNA polymerase III subunit delta  
DNA polymerase III subunit delta'  
DNA polymerase III subunit epsilon  
DNA polymerase III subunit gamma/tau  
DNA-directed RNA polymerase subunit alpha  
DNA-directed RNA polymerase subunit beta  
DNA-directed RNA polymerase subunit beta'  
DNA-directed RNA polymerase subunit omega  
thymidylate synthase (FAD)  
5'-nucleotidase  
uridylate kinase  
glutamate dehydrogenase  
aspartate carbamoyltransferase catalytic subunit  
amidophosphoribosyltransferase  
aspartate aminotransferase  
argininosuccinate lyase  
adenylosuccinate lyase  
glutamine synthetase  
glutamine synthetase  
adenylosuccinate synthase  
argininosuccinate synthase  
carbamoyl-phosphate synthase large subunit  
carbamoyl-phosphate synthase small subunit  
proline dehydrogenase / delta 1-pyrroline-5-carboxylate dehydrogenase  
aspartate-semialdehyde dehydrogenase  
dihydrolipoamide dehydrogenase  
dihydrolipoamide dehydrogenase  
glycine hydroxymethyltransferase  
5-aminolevulinate synthase  
aspartate kinase  
phosphatidylserine synthase

aspartate-semialdehyde dehydrogenase  
S-adenosylmethionine synthetase  
aspartate aminotransferase  
aspartate kinase  
dihydrolipoamide dehydrogenase  
dihydrolipoamide dehydrogenase  
propionyl-CoA carboxylase alpha chain  
propionyl-CoA carboxylase beta chain  
pyruvate dehydrogenase E1 component subunit alpha  
pyruvate dehydrogenase E1 component subunit beta  
leucyl-tRNA synthetase  
isoleucyl-tRNA synthetase  
valyl-tRNA synthetase  
aspartate-semialdehyde dehydrogenase  
N-acetyl-gamma-glutamyl-phosphate/N-acetyl-gamma-aminoadipyl-phosphate reductase  
dihydrodipicolinate reductase  
2,3,4,5-tetrahydropyridine-2-carboxylate N-succinyltransferase  
acetylornithine/N-succinyldiaminopimelate aminotransferase  
aspartate kinase  
acetylglutamate/acetylaminoadipate kinase  
succinyl-diaminopimelate desuccinylase  
diaminopimelate decarboxylase  
dihydrodipicolinate synthase  
diaminopimelate epimerase  
2-oxoglutarate dehydrogenase E1 component  
2-oxoglutarate dehydrogenase E2 component (dihydrolipoamide succinyltransferase)  
--  
N-acetyl-gamma-glutamyl-phosphate/N-acetyl-gamma-aminoadipyl-phosphate reductase  
glutamate dehydrogenase  
pyrroline-5-carboxylate reductase  
ornithine carbamoyltransferase  
glutamate N-acetyltransferase / amino-acid N-acetyltransferase  
aspartate aminotransferase  
acetylornithine/N-succinyldiaminopimelate aminotransferase  
acetylglutamate/acetylaminoadipate kinase  
cytosine deaminase  
argininosuccinate lyase  
glutamine synthetase  
glutamine synthetase  
argininosuccinate synthase  
proline dehydrogenase / delta 1-pyrroline-5-carboxylate dehydrogenase  
--  
--  
--  
--  
aspartate aminotransferase  
aspartate aminotransferase

--

protocatechuate 3,4-dioxygenase, beta subunit

--

--

--

2-oxoglutarate dehydrogenase E1 component

tryptophanyl-tRNA synthetase

3-phosphoshikimate 1-carboxyvinyltransferase

aspartate aminotransferase

aspartate aminotransferase

malonyl-CoA decarboxylase

thioredoxin reductase (NADPH)

thioredoxin reductase (NADPH)

methionyl-tRNA synthetase

glycine hydroxymethyltransferase

isocitrate dehydrogenase

glutathione S-transferase

leucyl aminopeptidase

glutamate--cysteine ligase

glutathione synthase

glucose-1-phosphate adenylyltransferase

glucose-1-phosphate adenylyltransferase

myo-inositol-1(or 4)-monophosphatase

D-alanyl-D-alanine carboxypeptidase (penicillin-binding protein 5/6)

1-acyl-sn-glycerol-3-phosphate acyltransferase

glycerol-3-phosphate acyltransferase PlsX

glycerol-3-phosphate acyltransferase PlsY

myo-inositol-1(or 4)-monophosphatase

triosephosphate isomerase (TIM)

glycerol-3-phosphate dehydrogenase (NAD(P)+)

1-acyl-sn-glycerol-3-phosphate acyltransferase

phosphatidate cytidyltransferase

CDP-diacylglycerol--glycerol-3-phosphate 3-phosphatidyltransferase

phosphatidylserine synthase

phosphatidylglycerophosphatase A

phosphatidylserine decarboxylase

phosphatidylserine decarboxylase

glycerol-3-phosphate acyltransferase PlsX

glycerol-3-phosphate acyltransferase PlsY

--

malate dehydrogenase

malate dehydrogenase (oxaloacetate-decarboxylating)(NADP+)

pyruvate dehydrogenase E1 component subunit alpha

pyruvate dehydrogenase E1 component subunit beta

dihydrolipoamide dehydrogenase

dihydrolipoamide dehydrogenase

pyruvate dehydrogenase E2 component (dihydrolipoamide acetyltransferase)

pyruvate,orthophosphate dikinase  
succinate dehydrogenase flavoprotein subunit  
succinate dehydrogenase iron-sulfur protein  
--  
protocatechuate 3,4-dioxygenase, beta subunit  
--  
--  
--  
--  
--  
--  
malate dehydrogenase  
phosphoglycolate phosphatase  
citrate synthase  
aconitate hydratase 1  
propionyl-CoA carboxylase alpha chain  
propionyl-CoA carboxylase beta chain  
malonyl-CoA decarboxylase  
succinyl-CoA synthetase alpha subunit  
succinyl-CoA synthetase beta subunit  
propionyl-CoA carboxylase alpha chain  
propionyl-CoA carboxylase beta chain  
--  
--  
pyruvate dehydrogenase E1 component subunit alpha  
pyruvate dehydrogenase E1 component subunit beta  
succinate dehydrogenase flavoprotein subunit  
succinate dehydrogenase iron-sulfur protein  
succinyl-CoA synthetase alpha subunit  
succinyl-CoA synthetase beta subunit  
glycine hydroxymethyltransferase  
phosphoribosylaminoimidazolecarboxamide formyltransferase / IMP cyclohydrolase  
methionyl-tRNA formyltransferase  
methylenetetrahydrofolate dehydrogenase (NADP+) / methenyltetrahydrofolate cyclohydrolase  
5-formyltetrahydrofolate cyclo-ligase  
thymidylate synthase (FAD)  
phosphoribosylglycinamide formyltransferase 1  
malate dehydrogenase  
glycine hydroxymethyltransferase  
enolase  
phosphoglycerate mutase  
malate dehydrogenase  
malate dehydrogenase (oxaloacetate-decarboxylating)(NADP+)  
transketolase  
aspartate aminotransferase  
phosphoglycerate kinase

pyruvate,orthophosphate dikinase  
fructose-bisphosphate aldolase, class I  
ribulose-phosphate 3-epimerase  
triosephosphate isomerase (TIM)  
ribose 5-phosphate isomerase B  
fructose-1,6-bisphosphatase II  
malate dehydrogenase  
isocitrate dehydrogenase  
succinate dehydrogenase flavoprotein subunit  
succinate dehydrogenase iron-sulfur protein  
methylenetetrahydrofolate dehydrogenase (NADP+) / methenyltetrahydrofolate cyclohydrolase  
fumarate hydratase, class II  
aconitate hydratase 1  
succinyl-CoA synthetase alpha subunit  
succinyl-CoA synthetase beta subunit  
propionyl-CoA carboxylase alpha chain  
propionyl-CoA carboxylase beta chain  
thiamine-phosphate pyrophosphorylase  
hydroxymethylpyrimidine/phosphomethylpyrimidine kinase  
thiamine-monophosphate kinase  
adenylyltransferase  
glycine oxidase  
cysteine desulfurase  
cysteine desulfurase  
riboflavin synthase  
6,7-dimethyl-8-ribityllumazine synthase  
GTP cyclohydrolase II  
3,4-dihydroxy 2-butanone 4-phosphate synthase  
diaminohydroxyphosphoribosylaminopyrimidine deaminase / 5-amino-6-(5-phosphoribosylamino)uracil reductase  
riboflavin kinase / FMN adenylyltransferase  
pyridoxamine 5'-phosphate oxidase  
pyridoxine 5-phosphate synthase  
nicotinate-nucleotide pyrophosphorylase (carboxylating)  
NAD+ kinase  
nicotinate-nucleotide adenylyltransferase  
NAD+ synthase (glutamine-hydrolysing)  
quinolinate synthase  
5'-nucleotidase  
dephospho-CoA kinase  
pantetheine-phosphate adenylyltransferase  
holo-[acyl-carrier protein] synthase  
phosphopantothenoylcysteine decarboxylase  
phosphopantothenate-cysteine ligase  
type III pantothenate kinase  
8-amino-7-oxononanoate synthase  
adenosylmethionine-8-amino-7-oxononanoate aminotransferase  
biotin synthetase



--

dethiobiotin synthetase

BirA family transcriptional regulator, biotin operon repressor / biotin-[acetyl-CoA-carboxylase] ligase

lipoic acid synthetase

lipoyl(octanoyl) transferase

dihydropteroate synthase

2-amino-4-hydroxy-6-hydroxymethyldihydropteridine diphosphokinase

GTP cyclohydrolase I

dihydroneopterin aldolase

dihydrofolate synthase / folylpolyglutamate synthase

coproporphyrinogen III oxidase

5-aminolevulinate synthase

uroporphyrinogen decarboxylase

porphobilinogen synthase

uroporphyrinogen-III synthase

hydroxymethylbilane synthase

ferrochelatase

glutamyl-tRNA synthetase

glutamyl-tRNA synthetase

protoheme IX farnesyltransferase

1-deoxy-D-xylulose-5-phosphate reductoisomerase

farnesyl diphosphate synthase

4-diphosphocytidyl-2-C-methyl-D-erythritol kinase

2-C-methyl-D-erythritol 4-phosphate cytidyltransferase

2-C-methyl-D-erythritol 2,4-cyclodiphosphate synthase

octaprenyl-diphosphate synthase

(E)-4-hydroxy-3-methylbut-2-enyl-diphosphate synthase

4-hydroxy-3-methylbut-2-enyl diphosphate reductase

--

--

tRNA dimethylallyltransferase

glutamate dehydrogenase

glutamine synthetase

glutamine synthetase

aspartate aminotransferase

aspartate aminotransferase

methionyl-tRNA formyltransferase

tyrosyl-tRNA synthetase

tryptophanyl-tRNA synthetase

threonyl-tRNA synthetase

leucyl-tRNA synthetase

isoleucyl-tRNA synthetase

alanyl-tRNA synthetase

valyl-tRNA synthetase

methionyl-tRNA synthetase

seryl-tRNA synthetase

aspartyl-tRNA synthetase

glycyl-tRNA synthetase alpha chain  
glycyl-tRNA synthetase beta chain  
prolyl-tRNA synthetase  
cysteinyl-tRNA synthetase  
glutamyl-tRNA synthetase  
glutamyl-tRNA synthetase  
arginyl-tRNA synthetase  
phenylalanyl-tRNA synthetase alpha chain  
phenylalanyl-tRNA synthetase beta chain  
histidyl-tRNA synthetase  
aspartyl-tRNA(Asn)/glutamyl-tRNA (Gln) amidotransferase subunit A  
aspartyl-tRNA(Asn)/glutamyl-tRNA (Gln) amidotransferase subunit B  
aspartyl-tRNA(Asn)/glutamyl-tRNA (Gln) amidotransferase subunit C  
lysyl-tRNA synthetase, class I  
glutathione S-transferase  
glutathione S-transferase  
IMP dehydrogenase  
GMP synthase (glutamine-hydrolysing)  
3-oxoacyl-[acyl-carrier protein] reductase  
transketolase  
iron(III) transport system ATP-binding protein  
phosphate transport system ATP-binding protein  
heme exporter protein A  
lipoprotein-releasing system ATP-binding protein  
zinc transport system ATP-binding protein  
glutamine synthetase  
glutamine synthetase  
two-component system, cell cycle sensor histidine kinase PleC  
two-component system, NtrC family, nitrogen regulation sensor histidine kinase NtrY  
ribonuclease III  
polyribonucleotide nucleotidyltransferase  
poly(A) polymerase  
enolase  
ribonuclease E  
DNA-directed RNA polymerase subunit alpha  
DNA-directed RNA polymerase subunit beta  
DNA-directed RNA polymerase subunit beta'  
DNA-directed RNA polymerase subunit omega  
DNA ligase (NAD+)  
replicative DNA helicase  
DNA primase  
DNA polymerase I  
DNA polymerase III subunit alpha  
DNA polymerase III subunit beta  
DNA polymerase III subunit delta  
DNA polymerase III subunit delta'  
DNA polymerase III subunit epsilon

DNA polymerase III subunit gamma/tau  
ribonuclease HI  
ribonuclease HII  
signal peptidase I  
signal peptidase II  
exodeoxyribonuclease III  
DNA ligase (NAD+)  
DNA polymerase I  
DNA-3-methyladenine glycosylase  
single-stranded-DNA-specific exonuclease  
endonuclease III  
DNA ligase (NAD+)  
DNA polymerase I  
DNA helicase II / ATP-dependent DNA helicase PcrA  
transcription-repair coupling factor (superfamily II helicase)  
DNA ligase (NAD+)  
DNA polymerase III subunit alpha  
DNA polymerase III subunit beta  
DNA polymerase III subunit delta  
DNA polymerase III subunit delta'  
DNA polymerase III subunit epsilon  
DNA polymerase III subunit gamma/tau  
exodeoxyribonuclease VII large subunit  
exodeoxyribonuclease VII small subunit  
DNA helicase II / ATP-dependent DNA helicase PcrA  
single-stranded-DNA-specific exonuclease  
crossover junction endodeoxyribonuclease RuvC  
DNA polymerase I  
DNA polymerase III subunit alpha  
DNA polymerase III subunit beta  
DNA polymerase III subunit delta  
DNA polymerase III subunit delta'  
DNA polymerase III subunit epsilon  
DNA polymerase III subunit gamma/tau  
ATP-dependent DNA helicase RecG  
primosomal protein N' (replication factor Y) (superfamily II helicase)  
single-stranded-DNA-specific exonuclease  
phosphatidate cytidylyltransferase  
myo-inositol-1(or 4)-monophosphatase  
ATP-dependent Lon protease  
ATP-dependent Clp protease, protease subunit  
replicative DNA helicase  
two-component system, cell cycle sensor histidine kinase PleC  
regulator of sigma E protease  
tRNA-specific 2-thiouridylase  
adenylyltransferase  
cysteine desulfurase

cysteine desulfurase  
isocitrate dehydrogenase  
malonyl-CoA decarboxylase  
superoxide dismutase, Fe-Mn family  
ubiquinol-cytochrome c reductase iron-sulfur subunit  
ubiquinol-cytochrome c reductase cytochrome b subunit  
ubiquinol-cytochrome c reductase cytochrome c1 subunit  
glutamine synthetase  
glutamine synthetase  
glyceraldehyde 3-phosphate dehydrogenase  
ubiquinol-cytochrome c reductase iron-sulfur subunit  
ubiquinol-cytochrome c reductase cytochrome b subunit  
ubiquinol-cytochrome c reductase cytochrome c1 subunit  
ubiquinol-cytochrome c reductase iron-sulfur subunit  
ubiquinol-cytochrome c reductase cytochrome b subunit  
ubiquinol-cytochrome c reductase cytochrome c1 subunit  
ubiquinol-cytochrome c reductase iron-sulfur subunit  
ubiquinol-cytochrome c reductase cytochrome b subunit  
ubiquinol-cytochrome c reductase cytochrome c1 subunit  
superoxide dismutase, Fe-Mn family  
fumarate hydratase, class II
